# Supplementary material for: A template-directed synthetic approach to halogen-bridged mixed-valence platinum complexes on artificial peptides in solution
Source: Royal Society of Chemistry journal article supplement (doi:10.1039/b711804j), 2007-01-01
Supplement: b711804j.pdf [file b711804j.pdf]

## A template-directed synthetic approach to halogen-bridged mixed-valence platinum complexes on artificial peptides in solution

Kentaro Tanaka,<sup>a,b</sup> Kenji Kaneko,<sup>a</sup> Yusuke Watanabe<sup>a</sup> and Mitsuhiro Shionoya<sup>\*a</sup>

<sup>a</sup> Department of Chemistry, Graduate School of Science, The University of Tokyo, Hongo, Bunkyo-ku, Tokyo 113-0033, Japan.

Fax: +81 3 5841 8061; Tel: +81 3 5841 8061; E-mail: shionoya@chem.s.u-tokyo.ac.jp

<sup>b</sup> Department of Chemistry, Graduate School of Science, Nagoya University, Furo-cho, Chikusa-ku, Nagoya 464-8602, Japan.

Fax: +81 52 789 2940; Tel: +81 52 789 2940; E-mail: kentaro@chem.nagoya-u.ac.jp

### Contents

1. General experimental methods ..... page S2
2. Syntheses of the Pt complex-pendant peptides ( $[\mathbf{1a-d}(\text{Pt(IV)Br}_2(\text{en}))_n](\text{RSO}_3)_{2n}$  and  $[\mathbf{1a-d}(\text{Pt(II)(en}))_n](\text{RSO}_3)_{2n}$ : ( $n = 2, 3, 9, 10$ ) and mononuclear Pt complexes ( $\text{R} = (\text{C}_{12}\text{H}_{25}\text{OCH}_2)_2\text{CHO}(\text{CH}_2)_3-$ ) ..... page S3
3. Photometric titration spectra of  $[\mathbf{1b}(\text{Pt(IV)Br}_2(\text{en}))_3](\text{RSO}_3)_6$  with  $[\mathbf{1a}(\text{Pt(II)(en}))_2](\text{RSO}_3)_4$  (Fig. S1) ..... page S21
4. Photometric titration spectra of  $[\mathbf{1d}(\text{Pt(IV)Br}_2(\text{en}))_{10}](\text{RSO}_3)_{20}$  with  $[\mathbf{1c}(\text{Pt(II)(en}))_9](\text{RSO}_3)_{18}$  (Fig. S2) ..... page S22
5. <sup>1</sup>H NMR titration spectra of  $[\mathbf{1a}(\text{Pt(IV)Br}_2(\text{en}))_2](\text{RSO}_3)_4$  with  $[\text{Pt(II)(en)}_2](\text{RSO}_3)_2$  (Fig. S3) ..... page S23
6. References ..... page S24

## General experimental methods

All reactions were carried out in oven dried glasswares with commercial dehydrated solvents (Wako Pure Chemical Industries). *N* $\alpha$ -*t*-Boc- $\beta$ -amino-L-alanine,<sup>1</sup> 1-amino-11-azido-3,6,9-trioxaundecane,<sup>2</sup> 1,3-bis-dodecyloxy-propan-2-ol,<sup>3</sup> [Pt(II)Br<sub>2</sub>(en)],<sup>4</sup> [Pt(II)(en)<sub>2</sub>]Br<sub>2</sub><sup>4</sup> and [Pt(IV)Br<sub>2</sub>(en)<sub>2</sub>]Br<sub>2</sub><sup>4</sup> were prepared according to previously published procedures. 0.5 M NH<sub>3</sub>/1,4-dioxane was purchased from Sigma-Aldrich. 40% Methylamine/methanol, 4 M HCl/1,4-dioxane, *N*-methyl morpholine and 1-ethyl-3-(3'-dimethylaminopropyl)-carbodiimide-HCl were purchased from Tokyo Chemical Industry. 9-fluorenylmethyloxycarbonyl-*N*-hydroxysuccinimide (Fmoc-OSu), Rink Amide AM-resin and 2-(1H-benzotriazol-1-yl)-1,1,3,3-tetramethylammonium hexafluorophosphate (HBTU) were purchased from Novabiochem. Reverse-phase-high performance liquid chromatography (RP-HPLC) eluents were purchased from Kanto Chemical. All other reagents were purchased from Wako Pure Chemical Industries and were used without further purification. Column chromatography was performed using Wakogel C-300 silica gel (Wako Pure Chemical Industries). Reverse-phase column chromatography was performed using Wakogel 50C18 silica gel (Wako Pure Chemical Industries). Thin-layer chromatography was performed on silica gel 60 F<sub>254</sub> 1.0554 (Merck). Anion exchange column chromatography was carried out on Amberlite IRA-400 (Organo). <sup>1</sup>H, <sup>13</sup>C and <sup>1</sup>H-<sup>1</sup>H COSY NMR spectra were recorded on a Bruker DRX 500 (500 MHz <sup>1</sup>H; 125.65 MHz <sup>13</sup>C) spectrometer. The spectra are referenced to either Me<sub>4</sub>Si in acetonitrile-*d*<sub>3</sub>, chloroform-*d*, dichloromethane-*d*<sub>2</sub> and methanol-*d*<sub>4</sub> or the signal of the solvent (acetonitrile-*d*<sub>3</sub>; 1.94 ppm). Chemical shifts ( $\delta$ ) are reported in ppm; multiplicities are indicated by: s (singlet), d (doublet), t (triplet), dd (double doublet), dt (double triplet), m (multiplet), br (broad). Coupling constants, *J*, are reported in Hz. Electrospray ionization-time-of-flight (ESI-TOF) mass spectra were recorded on a Micromass LCT spectrometer. RP-HPLC was carried out on a TOSOH instrument equipped with a solvent delivery pump (preparative; CCPP-M, analysis; CCPM-II), an UV-vis absorbance detector (UV-8020) and a temperature controller (CO-8020) with Wakopak Navi C18-5 (preparative; 20 × 250 mm, analysis; 4.6 × 250 mm) columns and eluents specialized in HPLC. Gel permeation chromatography (GPC) was performed on a recycling preparative HPLC (Japan Analytical Industry; LC-928R/U) with an UV-vis absorbance detector (S-3740) with a JAIGEL-2H-40 (40 × 600 mm) column. UV-vis absorption spectra were recorded on a Hitachi U-3500 spectrometer equipped with a Peltier thermoelectric temperature control unit.

**Syntheses of the Pt complex-pendant peptides ( $[1a-d(Pt(IV)Br_2(en))_n](RSO_3)_2n$  and  $[1a-d(Pt(II)(en))_n](RSO_3)_2n$ ; ( $n = 2, 3, 9, 10$ ) and mononuclear Pt complexes ( $R = (C_{12}H_{25}OCH_2)_2CHO(CH_2)_3-$ )**

The building block **1** of the template peptides was prepared according to Scheme S1.

**Scheme S1** Synthetic route to the building block **1**.

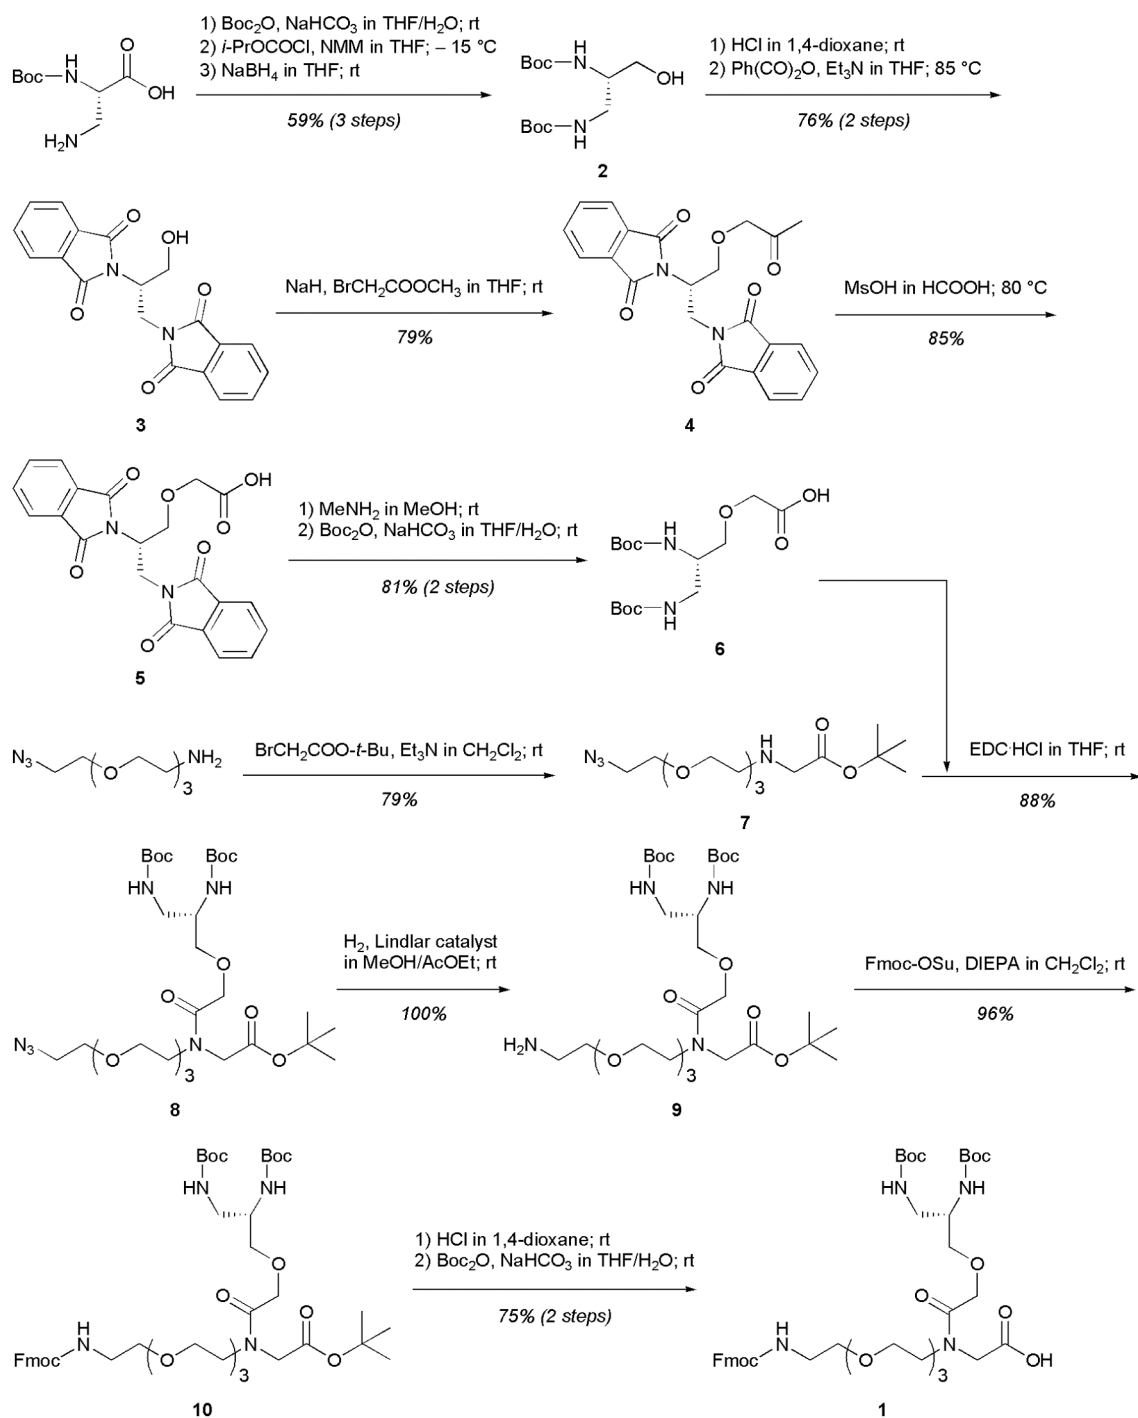

Pt complex-pendant peptides ( $[\mathbf{1a-d}(\text{Pt(II)}(\text{en}))_n](\text{RSO}_3)_2$ ) and  $[\mathbf{1a-d}(\text{Pt(IV)}\text{Br}_2(\text{en}))_n](\text{RSO}_3)_2$ : ( $n = 2, 3, 9, 10$ )) were prepared according to Scheme S2.

**Scheme S2** A synthetic route to Pt complex-pendant peptides ( $[\mathbf{1a-d}(\text{Pt(II)}(\text{en}))_n](\text{RSO}_3)_2$ ) and  $[\mathbf{1a-d}(\text{Pt(IV)}\text{Br}_2(\text{en}))_n](\text{RSO}_3)_2$ .

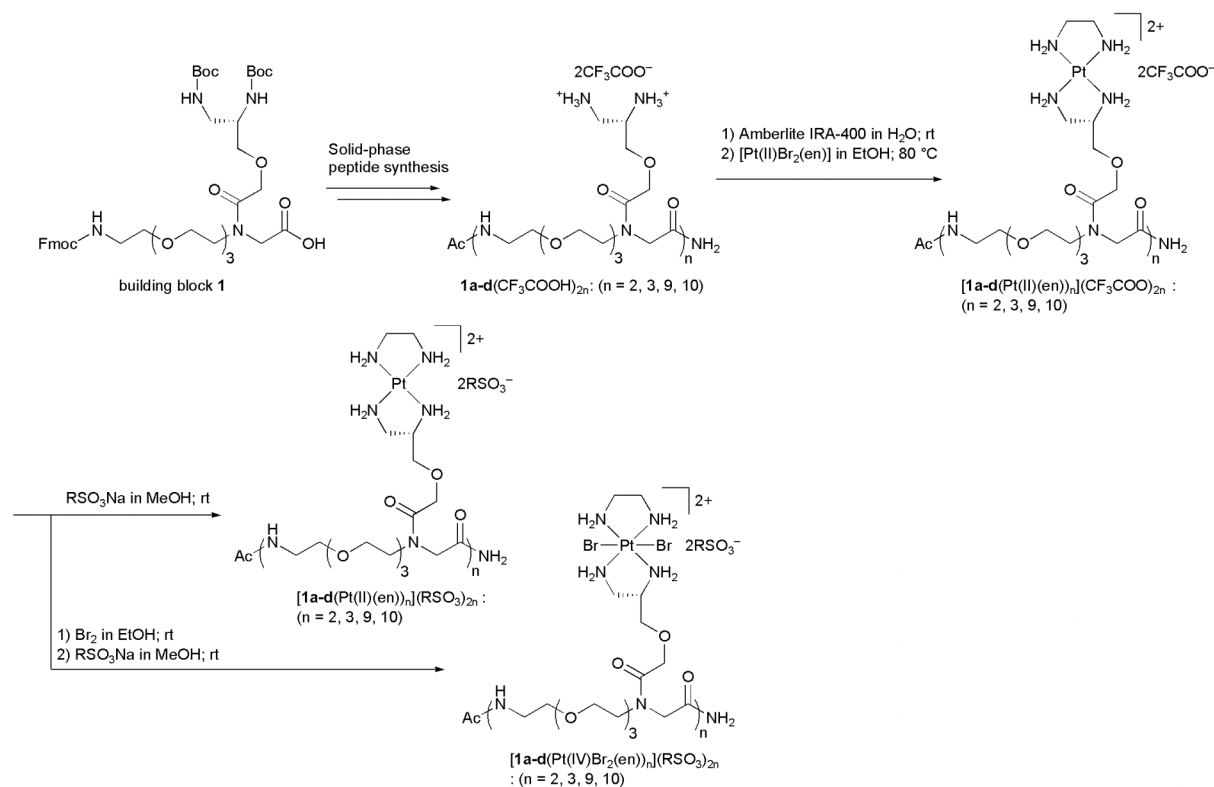

A sodium dialkylsulfonate,  $\text{RSO}_3\text{Na}$ , was synthesized according to Scheme S3.

**Scheme S3** Synthesis of  $\text{RSO}_3\text{Na}$ .

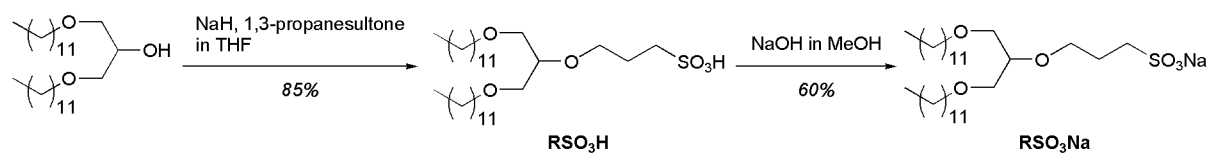

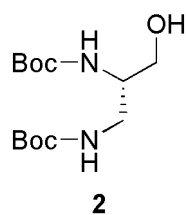

### Synthesis of (S)-N,N'-di-*t*-Boc-2,3-diaminopropanol **2**

To a solution of *N* $\alpha$ -*t*-Boc- $\beta$ -amino-L-alanine (6.60 g, 32.3 mmol) and NaHCO<sub>3</sub> (2.72 g, 32.3 mmol) in THF/water (1:1, 66 cm<sup>3</sup>) was added dropwise a solution of di-*t*-butyl-dicarbonate (Boc<sub>2</sub>O, 7.42 cm<sup>3</sup>, 32.3 mmol) in THF (50 cm<sup>3</sup>) at 0 °C under a nitrogen atmosphere. After stirring for 15 h at room temperature, THF was removed under reduced pressure and dried *in vacuo*. 5% KHSO<sub>4</sub> aqueous solution (250 cm<sup>3</sup>) was added to the residue, and di-Boc compound was extracted with ethyl acetate (3  $\times$  250 cm<sup>3</sup>). The combined organic layer was washed with 5% KHSO<sub>4</sub> aqueous solution (100 cm<sup>3</sup>) and water (100 cm<sup>3</sup>). The organic layer was dried over anhydrous MgSO<sub>4</sub> and the solvent was removed under reduced pressure and dried *in vacuo*. To a solution of the residue (10.4 g) in THF (170 cm<sup>3</sup>) was added dropwise *N*-methyl morpholine (3.76 cm<sup>3</sup>, 34.2 mmol) and isopropyl chloroformate (3.92 cm<sup>3</sup>, 34.2 mmol) at -15 °C under a nitrogen atmosphere. After stirring for 15 min at -15 °C, sodium tetrahydroborate (1.94 g, 51.2 mmol) was carefully added to the mixture and stirred for 45 min at room temperature. The reaction was quenched by adding methanol (100 cm<sup>3</sup>), and then the solvent was removed under reduced pressure. The residue was dissolved in ethyl acetate (300 cm<sup>3</sup>) and washed with 5% KHSO<sub>4</sub>/brine (3  $\times$  150 cm<sup>3</sup>) and water (2  $\times$  100 cm<sup>3</sup>). The organic layer was dried over anhydrous MgSO<sub>4</sub> and the solvent was removed under reduced pressure and dried *in vacuo*. The crude material was chromatographed on silica gel with CH<sub>2</sub>Cl<sub>2</sub>/methanol (100:0 - 99:1) to give compound **2** (5.50 g, 59% (3 steps)) as a colorless solid (Found: C, 53.59; H, 9.02; N, 9.50. C<sub>13</sub>H<sub>26</sub>N<sub>2</sub>O<sub>5</sub> requires C, 53.78; H, 9.02; N, 9.65); *R*<sub>f</sub> 0.50 (chloroform/methanol/acetic acid (90:10:1));  $\delta$ <sub>H</sub>(500 MHz; CDCl<sub>3</sub>; Me<sub>4</sub>Si) 5.14 (d, *J* = 8.2 Hz, 1H, Boc-NHCH-), 5.06 (br, 1H, Boc-NHCH<sub>2</sub>-), 3.75-3.72 (m, 1H, -OH, D<sub>2</sub>O exchangeable), 3.69-3.67 (m, 1H, -CHHOH), 3.57 (br, 1H, methine), 3.51 (br, 1H, -CHHOH), 3.34-3.19 (m, 2H, Boc-NHCH<sub>2</sub>-), 1.44 (s, 9H, *t*-Bu), 1.44 (s, 9H, *t*-Bu);  $\delta$ <sub>C</sub>(125 MHz; CDCl<sub>3</sub>; Me<sub>4</sub>Si) 157.9, 155.9, 80.5, 79.8, 61.7, 52.4, 40.3, 28.5, 28.4; *m/z* (ESI-TOF) 313.23 (M + Na<sup>+</sup>. C<sub>13</sub>H<sub>26</sub>N<sub>2</sub>NaO<sub>5</sub> requires 313.18).

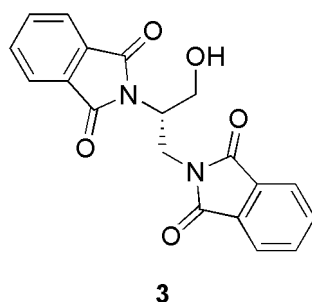

### Synthesis of (*S*)-2,3-bis(phthalimido)propanol **3**

A solution of compound **2** (5.00 g, 17.2 mmol) in 4 M HCl/1,4-dioxane (25 cm<sup>3</sup>, 100 mmol) was stirred for 11 h at room temperature. After the solvent was evaporated, the residue was dissolved in THF (60 cm<sup>3</sup>) and then triethylamine (3.48 cm<sup>3</sup>, 34.4 mmol) and phthalic anhydride (5.10 g, 34.4 mmol) were added to the solution. The reaction mixture was stirred for 3 h at room temperature, and then heated at reflux for 10 h at 80 °C. The solvent was removed under reduced pressure and 5% KHSO<sub>4</sub> aqueous solution (100 cm<sup>3</sup>) was added to the residue, which was extracted with ethyl acetate (3 × 100 cm<sup>3</sup>) and the combined organic layer was dried over anhydrous MgSO<sub>4</sub> and the solvent was removed under reduced pressure. The crude solid was washed with cooled ethanol to afford compound **3** (3.85 g) as a colorless solid. The resulting filtrate was recrystallized with ethanol (30 cm<sup>3</sup>) to afford compound **3** (0.74 g) as colorless needles (4.59 g, 76% in total (2 steps)) (Found: C, 64.80; H, 4.31; N, 7.79. C<sub>19</sub>H<sub>14</sub>N<sub>2</sub>O<sub>5</sub> requires C, 65.14; H, 4.03; N, 8.00); *R<sub>f</sub>* 0.80 (*n*-butanol/pyridine/acetic acid/water (4:1:1:2)); δ<sub>H</sub>(500 MHz; CDCl<sub>3</sub>; Me<sub>4</sub>Si) 7.82-7.67 (m, 8H, 2 × phthalimide), 4.68-4.63 (m, 1H, methine), 4.34 (dd, *J* = 14.6, 8.5 Hz, 1H, -NCHHCH-), 4.14 (dd, *J* = 7.0, 5.3 Hz, 2H, -CH<sub>2</sub>OH), 4.09 (dd, *J* = 14.6, 3.5 Hz, 1H, -NCHHCH-), 3.44 (t, *J* = 7.0 Hz, 1H, -OH, D<sub>2</sub>O exchangeable); δ<sub>C</sub>(125 MHz; CDCl<sub>3</sub>; Me<sub>4</sub>Si) 169.1, 168.5, 134.4, 134.3, 131.9, 131.7, 123.6, 123.6, 61.8, 52.8, 37.3; *m/z* (ESI-TOF) 373.10 (M + Na<sup>+</sup>. C<sub>19</sub>H<sub>14</sub>N<sub>2</sub>NaO<sub>5</sub> requires 373.08).

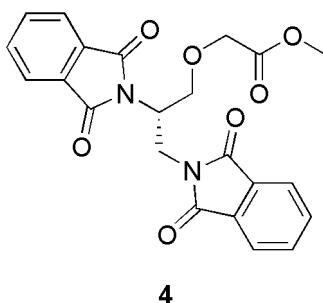

### Synthesis of methyl (*S*)-5,6-bis(phthalimido)-3-oxahexanoate **4**

To a solution of compound **3** (767 mg, 2.19 mmol) in THF (10 cm<sup>3</sup>) was added sodium hydride (in oil (60%), 350 mg, 8.75 mmol) at room temperature. After stirring for 5 min at room temperature, methyl

bromoacetate (0.83 cm<sup>3</sup>, 8.75 mmol) was added and then stirred for 48 h at room temperature. The mixture was poured into 10 cm<sup>3</sup> of ice water and 5% KHSO<sub>4</sub>/brine (50 cm<sup>3</sup>) was added, which was extracted with ethyl acetate (3 × 50 cm<sup>3</sup>). The combined organic layer was dried over anhydrous MgSO<sub>4</sub> and the solvent was removed under reduced pressure. The crude material was purified by silica gel column chromatography with *n*-hexane/ethyl acetate (3:1) to obtain compound **4** (735 mg, 79%) as a colorless syrup; *R<sub>f</sub>* 0.74 (chloroform/methanol/acetic acid (90:10:1)); δ<sub>H</sub>(500 MHz; CDCl<sub>3</sub>; Me<sub>4</sub>Si) 7.82-7.67 (m, 8H, 2 × phthalimide), 4.80-4.75 (m, 1H, methine), 4.31 (dd, *J* = 14.3, 8.4 Hz, 1H, -NCHHCH-), 4.18 (dd, *J* = 14.3, 8.4 Hz, 1H, -CHCHHO-), , 4.13 (dd, *J* = 10.2, 6.0 Hz, 1H, -CHCHHO-), 4.13 (s, 2H, -OCH<sub>2</sub>CO-), 4.12 (dd, *J* = 14.3, 4.0 Hz, 1H, -NCHHCH-), 3.69 (s, 3H, methyl); δ<sub>C</sub>(125 MHz; CDCl<sub>3</sub>; Me<sub>4</sub>Si) 173.4, 168.5, 168.3, 134.3, 134.3, 131.8, 131.8, 123.6, 123.6, 69.2, 68.0, 50.5, 37.2, 31.1; *m/z* (ESI-TOF) 445.18 (M + Na<sup>+</sup>. C<sub>22</sub>H<sub>18</sub>N<sub>2</sub>NaO<sub>6</sub> requires 445.10).

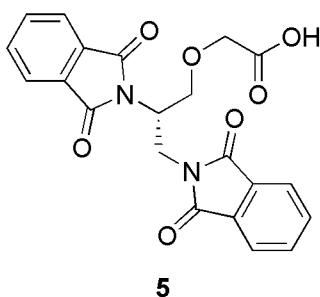

#### Synthesis of (*S*)-5,6-bis(phthalimido)-3-oxahexanoic acid **5**

To a solution of compound **4** (1.05 g, 2.49 mmol) in formic acid (25 cm<sup>3</sup>) was added methane sulfonic acid (0.16 cm<sup>3</sup>, 2.49 mmol) at room temperature. After stirring for 16 h at 80 °C, the mixture was poured into 150 cm<sup>3</sup> of water, and then **5** was extracted with chloroform (3 × 150 cm<sup>3</sup>). The combined organic layer was washed with brine (100 cm<sup>3</sup>) and dried over anhydrous MgSO<sub>4</sub> and the solvent was removed under reduced pressure. The crude material was purified by silica gel column chromatography with chloroform/methanol (99:1) to afford compound **5** (0.86 g, 85%) as a colorless syrup; *R<sub>f</sub>* 0.45 (chloroform/methanol/acetic acid (90:10:1)); δ<sub>H</sub>(500 MHz; CDCl<sub>3</sub>; Me<sub>4</sub>Si) 7.82-7.69 (m, 8H, 2 × phthalimide), 4.79-4.74 (m, 1H, methine), 4.33 (dd, *J* = 14.3, 8.0 Hz, 1H, -NCHHCH-), 4.20-4.11 (m, 5H, -NCHHCH-, -CHCH<sub>2</sub>O-, -OCH<sub>2</sub>CO-); δ<sub>C</sub>(125 MHz; CDCl<sub>3</sub>; Me<sub>4</sub>Si) 174.1, 168.5, 168.3, 134.3, 134.3, 131.8, 131.8, 123.6, 123.6 69.2, 67.9, 50.5, 37.2; *m/z* (ESI-TOF) 431.16 (M + Na<sup>+</sup>. C<sub>21</sub>H<sub>16</sub>N<sub>2</sub>NaO<sub>7</sub> requires 431.09).

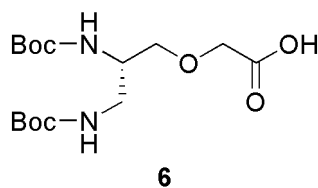

### Synthesis of (S)-N,N'-di-*t*-Boc-5,6-diamino-3-oxahexanoic acid **6**

Compound **5** (850 mg, 2.08 mmol) was dissolved in 40% methylamine/methanol (10 cm<sup>3</sup>, 253 mmol) and stirred for 8 h at room temperature. After removal of the solvent and dried *in vacuo*, the residue was dissolved in water (100 cm<sup>3</sup>) and washed with chloroform/THF (4:1, 8 × 100 cm<sup>3</sup>). The solvent of the aqueous layer was removed under reduced pressure and dried *in vacuo*. To a solution of the crude material (362 mg) in THF/water (1:1, 10 cm<sup>3</sup>) was added NaHCO<sub>3</sub> (350 mg, 4.16 mmol) and Boc<sub>2</sub>O (1.00 cm<sup>3</sup>, 4.16 mmol). After stirring for 11 h at room temperature, THF was removed under reduced pressure, and then 5% KHSO<sub>4</sub> aqueous solution (30 cm<sup>3</sup>) was added, which was extracted with ethyl acetate (3 × 40 cm<sup>3</sup>). The combined organic layer was dried over anhydrous MgSO<sub>4</sub> and the solvent was removed under reduced pressure. The crude material was purified by silica gel column chromatography with chloroform/methanol (100:0 - 99:1) to obtain compound **6** (584 mg, 81% (2 steps)) as a colorless syrup; *R<sub>f</sub>* 0.72 (*n*-butanol/pyridine/acetic acid/water (4:1:1:2)); δ<sub>H</sub>(500 MHz; CDCl<sub>3</sub>; Me<sub>4</sub>Si) 5.35-5.20 (m, 2H, Boc-NHCH-, Boc-NHCH<sub>2</sub>-), 4.18-4.05 (m, 2H, -OCH<sub>2</sub>CO-), 3.81 (br, 1H, methine), 3.67-3.65 (m, 1H, -CHCHHO-), 3.55-3.52 (m, 1H, -CHCHHO-), 3.41-3.32 (m, 2H, Boc-NHCH<sub>2</sub>-), 1.44 (m, 18H, 2 × Boc); δ<sub>C</sub>(125 MHz; CDCl<sub>3</sub>; Me<sub>4</sub>Si) 172.9, 157.0, 156.1, 80.0, 79.8, 71.4, 68.3, 50.7, 41.6, 28.4; *m/z* (ESI-TOF) 371.19 (M + Na<sup>+</sup>. C<sub>15</sub>H<sub>28</sub>N<sub>2</sub>NaO<sub>7</sub> requires 371.18).

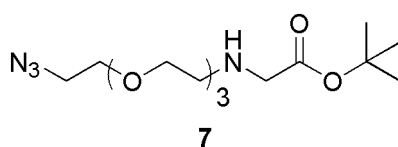

### Synthesis of N-(11-azido-3,6,9-trioxaundecyl)glycine *t*-butyl ester **7**

To a solution of 1-amino-11-azido-3,6,9-trioxaundecane (19.5 g, 89.3 mmol) and triethylamine (24.8 cm<sup>3</sup>, 179 mmol) in CH<sub>2</sub>Cl<sub>2</sub> (200 cm<sup>3</sup>) was added dropwise within 1 h a solution of *t*-butyl bromoacetate (13.1 cm<sup>3</sup>, 89.3 mmol) in CH<sub>2</sub>Cl<sub>2</sub> (300 cm<sup>3</sup>) at 0 °C with a dropping funnel under a nitrogen atmosphere. After stirring for 17 h at room temperature, the mixture was washed with brine (3 × 500 cm<sup>3</sup>). The organic layer was dried over anhydrous Na<sub>2</sub>SO<sub>4</sub> and the solvent was removed under reduced pressure and dried *in vacuo*. The crude material (31.2 g) was purified by silica gel column chromatography with chloroform/methanol (50:1 - 20:1) to obtain compound **7** (23.5 g, 79%) as a yellow-brown solution; *R<sub>f</sub>* 0.61 (*n*-butanol/pyridine/water (4:1:2)); δ<sub>H</sub>(500 MHz; CDCl<sub>3</sub>; Me<sub>4</sub>Si)



3.70-3.63 (m, 10H, N<sub>3</sub>CH<sub>2</sub>CH<sub>2</sub>O-, -OCH<sub>2</sub>CH<sub>2</sub>OCH<sub>2</sub>CH<sub>2</sub>O-), 3.59 (t, *J* = 5.6 Hz, 2H, -NHCH<sub>2</sub>CH<sub>2</sub>-), 3.40 (t, *J* = 5.1 Hz, 2H, N<sub>3</sub>CH<sub>2</sub>-), 3.33 (m, 2H, -NHCH<sub>2</sub>CO-), 2.80 (t, *J* = 5.6 Hz, 2H, -NHCH<sub>2</sub>CH<sub>2</sub>-), 1.47 (s, 9H, *t*-Bu); δ<sub>C</sub>(125 MHz; CDCl<sub>3</sub>; Me<sub>4</sub>Si) 171.5, 81.0, 70.7, 70.7, 70.6, 70.6, 70.3, 70.0, 51.7, 51.7, 50.6, 48.7.

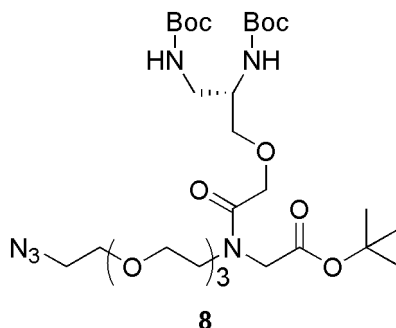

### Synthesis of

#### *N*-[(*S*)-*N,N'*-di-*t*-Boc-2,3-diaminopropoxy]acetyl-*N*-(11-azido-3,6,9-trioxaundecyl)glycine *t*-butyl ester **8**

To a solution of compound **7** (7.36 g, 22.1 mmol) and compound **6** (7.71 g, 22.1 mmol) in THF (50 cm<sup>3</sup>) was added 1-ethyl-3-(3'-dimethylaminopropyl)-carbodiimide·HCl (8.49 g, 44.3 mmol) at 0 °C under a nitrogen atmosphere. After stirring for 12 h at room temperature, THF was removed under reduced pressure and ethyl acetate (600 cm<sup>3</sup>) was added. The mixture was washed with 1% NaHCO<sub>3</sub> aqueous solution (600 cm<sup>3</sup>) and brine (2 × 600 cm<sup>3</sup>). The organic layer was dried over anhydrous Na<sub>2</sub>SO<sub>4</sub> and the solvent was removed under reduced pressure and dried *in vacuo*. The crude material (15.6 g) was purified by silica gel column chromatography with *n*-hexane/ethyl acetate (1:2) to obtain compound **8** (12.9 g, 88%) as a pale yellow syrup; *R*<sub>f</sub> 0.67 (chloroform/methanol (9:1)); δ<sub>H</sub>(500 MHz; CD<sub>3</sub>CN) 5.83-5.75 (br, 2H, 2 × Boc-NH-), 4.33-3.92 (m, 4H, -OCH<sub>2</sub>CO-, -NCH<sub>2</sub>CO-), 3.64-3.36 (m, 19H, -CHNH-, -OCH<sub>2</sub>CH<sub>2</sub>N-, -OCH<sub>2</sub>CH<sub>2</sub>OCH<sub>2</sub>CH<sub>2</sub>O-, N<sub>3</sub>CH<sub>2</sub>CH<sub>2</sub>O-, -OCH<sub>2</sub>CH-), 3.20-3.16 (m, 2H, Boc-NHCH<sub>2</sub>-), 1.47-1.41 (m, 27H, *t*-Bu, 2 × Boc); *m/z* (ESI-TOF) 685.30 (M + Na<sup>+</sup>. C<sub>29</sub>H<sub>54</sub>N<sub>6</sub>NaO<sub>11</sub> requires 685.37).

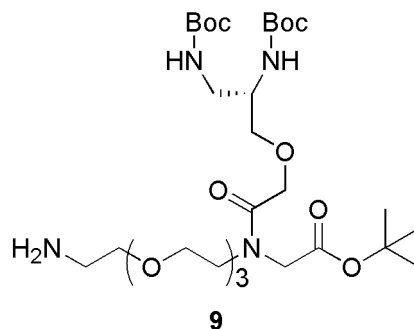

### Synthesis of

#### *N*-[(*S*)-*N,N'*-di-*t*-Boc-2,3-diaminopropoxy]acetyl-*N*-(11-amino-3,6,9-trioxaundecyl)glycine *t*-butyl ester **9**

To a solution of compound **8** (12.9 g, 19.6 mmol) in methanol/ethyl acetate (1:1, 100 cm<sup>3</sup>) was added a suspension of Lindlar catalyst (5% Pd, 1.21 g, 0.57 mmol as Pd) in methanol/ethyl acetate (1:1, 100 cm<sup>3</sup>) at room temperature. After stirring for 4 h at room temperature under a hydrogen atmosphere, the catalyst was filtered off. The solvent of the filtrate was removed under reduced pressure and dried *in vacuo*. The crude material was purified by silica gel column chromatography with chloroform/methanol/triethylamine (99.9:0:0.1 - 89.9:10:0.1) to give compound **9** (12.4 g, 100%) as a colorless syrup;  $R_f$  0.15 (chloroform/methanol (9:1));  $\delta_H$  (500 MHz; CD<sub>3</sub>CN) 5.98-5.80 (m, 2H, 2 × Boc-NH-), 4.33-3.96 (m, 4H, -OCH<sub>2</sub>CO-, -NCH<sub>2</sub>CO-), 3.65 (br, 1H, -CHNH-), 3.57-3.40 (m, 16H, -OCH<sub>2</sub>CH<sub>2</sub>N-, -OCH<sub>2</sub>CH<sub>2</sub>OCH<sub>2</sub>CH<sub>2</sub>O-, H<sub>2</sub>NCH<sub>2</sub>CH<sub>2</sub>O-, -OCH<sub>2</sub>CH-), 3.20-3.17 (m, 2H, Boc-NHCH<sub>2</sub>-), 2.73-2.71 (m, 2H, H<sub>2</sub>NCH<sub>2</sub>-), 1.47-1.41 (m, 27H, *t*-Bu, 2 × Boc);  $m/z$  (ESI-TOF) 659.48 (M + Na<sup>+</sup>. C<sub>29</sub>H<sub>56</sub>N<sub>4</sub>NaO<sub>11</sub> requires 659.38).

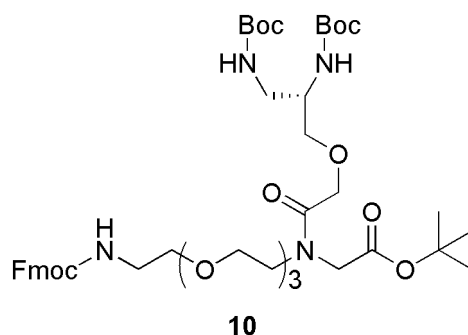

### Synthesis of

#### *N*-[(*S*)-*N,N'*-di-*t*-Boc-2,3-diaminopropoxy]acetyl-*N*-(*N*-Fmoc-11-amino-3,6,9-trioxaundecyl) glycine *t*-butyl ester **10**

To a solution of compound **9** (162 mg, 0.25 mmol) and *N,N*-diisopropylethylamine (DIPEA, 43.4 mm<sup>3</sup>, 0.25 mmol) in CH<sub>2</sub>Cl<sub>2</sub> (3.0 cm<sup>3</sup>) was added Fmoc-OSu (85.6 mg, 0.25 mmol) at 0 °C under a nitrogen atmosphere. After stirring for 50 min at room temperature, ethyl acetate (50 cm<sup>3</sup>) was added into the mixture, and then the organic layer was washed with brine (3 × 50 cm<sup>3</sup>). The organic layer was dried over anhydrous Na<sub>2</sub>SO<sub>4</sub>, and the solvent was removed under reduced pressure and dried *in vacuo*. The crude material (217 mg) was purified by silica gel column chromatography with *n*-hexane/ethyl acetate (2:3 - 1:2) to obtain compound **10** (210 mg, 96%) as a colorless syrup; *R<sub>f</sub>* 0.75 (chloroform/methanol/triethylamine (9:1:1)); δ<sub>H</sub>(500 MHz; CD<sub>3</sub>CN) 7.84 (d, *J* = 7.5 Hz, 2H, 4,5-fluoren), 7.67 (d, *J* = 7.4 Hz, 2H, 1,8-fluoren), 7.43 (dd, *J* = 7.4, 7.4 Hz, 2H, 3,6-fluoren), 7.35 (dd, *J* = 7.4, 7.4 Hz, 2H, 2,7-fluoren), 5.84-5.74 (br, 3H, Fmoc-NH-, 2 × Boc-NH-), 4.37-4.35 (m, 2H, fluoren-CH<sub>2</sub>), 4.31-3.94 (m, 5H, 9-fluoren, -OCH<sub>2</sub>CO-, -NCH<sub>2</sub>CO-), 3.65 (1H, br, -CHNH-), 3.55-3.37 (m, 16H, -OCH<sub>2</sub>CH<sub>2</sub>N-, -OCH<sub>2</sub>CH<sub>2</sub>OCH<sub>2</sub>CH<sub>2</sub>O-, -NHCH<sub>2</sub>CH<sub>2</sub>O-, -OCH<sub>2</sub>CH-), 3.25 (dt, *J* = 5.5, 5.6 Hz, 2H, Fmoc-NHCH<sub>2</sub>-), 3.18 (dd, *J* = 6.2, 6.5 Hz, 2H, Boc-NHCH<sub>2</sub>-), 1.45-1.39 (m, 27H, *t*-Bu, 2 × Boc); *m/z* (ESI-TOF) 881.52 (M + Na<sup>+</sup>. C<sub>44</sub>H<sub>66</sub>N<sub>4</sub>NaO<sub>13</sub> requires 881.45).

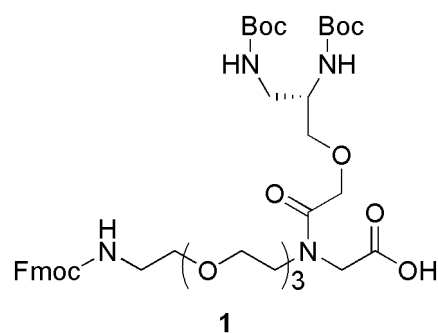

### Synthesis of

#### *N*-[(*S*)-*N,N'*-di-*t*-Boc-2,3-diaminopropoxy]acetyl-*N*-(*N*-Fmoc-11-amino-3,6,9-trioxaundecyl) glycine **1**

A solution of compound **10** (10.3 g, 12.0 mmol) in 4 M HCl/1,4-dioxane (100 cm<sup>3</sup>, 400 mmol) was stirred for 3 h at room temperature. The solvent was removed under reduced pressure and dried *in vacuo*. To a solution of the residue in THF/water (1:1, 200 cm<sup>3</sup>) was added NaHCO<sub>3</sub> (3.02 g, 35.9 mmol) and Boc<sub>2</sub>O (5.23 g, 24.0 mmol) at 0 °C. After stirring for 12 h at room temperature, 5% KHSO<sub>4</sub>/brine (500 cm<sup>3</sup>) was added to the solution and compound **1** was extracted with ethyl acetate (500 cm<sup>3</sup>). The organic layer was washed with brine (3 × 500 cm<sup>3</sup>) and dried over anhydrous Na<sub>2</sub>SO<sub>4</sub>, and then the solvent was removed under reduced pressure and dried *in vacuo*. The crude material was purified by silica gel column with chloroform/methanol (100:0 - 50:1), GPC with chloroform and silica gel column chromatography with CH<sub>2</sub>Cl<sub>2</sub>/methanol (100:1) to obtain compound **1** (7.24 g, 75%) as a colorless syrup (Found: C, 58.59; H, 7.48; N, 6.71. C<sub>40</sub>H<sub>58</sub>N<sub>4</sub>O<sub>13</sub>·H<sub>2</sub>O requires C, 58.52; H, 7.37;

N, 6.82);  $R_f$  0.59 (chloroform/methanol (3:1));  $\delta_H$ (500 MHz;  $CD_3CN$ ;  $Me_4Si$ ) 7.84 (d,  $J = 7.5$  Hz, 2H, 4,5-fluoren), 7.67 (d,  $J = 7.3$  Hz, 2H, 1,8-fluoren), 7.43 (dd,  $J = 7.5, 7.5$  Hz, 2H, 3,6-fluoren), 7.35 (dd,  $J = 7.4, 7.4$  Hz, 2H, 2,7-fluoren), 5.90-5.73 (m, 3H, Fmoc-NH-, 2  $\times$  Boc-NH-), 4.36 (m, 2H, fluoren- $CH_2$ ), 4.30-4.04 (m, 5H, 9-fluoren,  $-OCH_2CO-$ ,  $-NCH_2CO-$ ), 3.64 (br, 1H,  $-CHNH-$ ), 3.57-3.41 (m, 16H,  $-OCH_2CH_2N-$ ,  $-OCH_2CH_2OCH_2CH_2O-$ ,  $-NHCH_2CH_2O-$ ,  $-OCH_2CH-$ ), 3.28-3.24 (m, 2H, Fmoc-NH $CH_2$ -), 3.18-3.14 (m, 2H, Boc-NH $CH_2$ -), 1.40 (m, 18H, 2  $\times$  Boc);  $m/z$  (ESI-TOF) 825.46 ( $M + Na^+$ .  $C_{40}H_{58}N_4NaO_{13}$  requires 825.39).

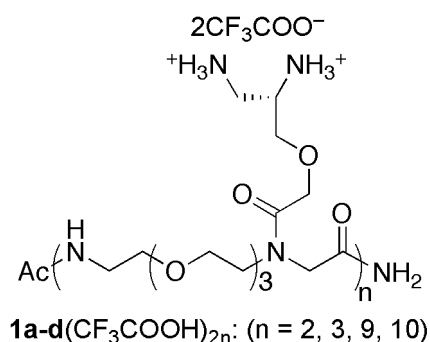

### Synthesis of peptide trifluoroacetate salts **1a-d(CF<sub>3</sub>COOH)<sub>2n</sub>**: (n = 2, 3, 9, 10)

Peptide trifluoroacetate salts (**1a-d(CF<sub>3</sub>COOH)<sub>2n</sub>**: (n = 2, 3, 9, 10)) were manually synthesized using standard solid phase methods in Fmoc chemistry with HBTU/hydroxybenzotriazole (HOBt)/DIPEA activation methods. A polypropylene tube equipped with a polypropylene filter and a luer-lock cap was used as a reaction vessel. Rink Amide AM-resin (0.71 mmol/g) was used to synthesize peptide amides. The resin was swollen in DMF (5 cm<sup>3</sup>) for 30 min and Fmoc-deprotected with 20% piperidine in DMF (5 cm<sup>3</sup>) twice for 30 min. The resin was filtered and washed with DMF (4  $\times$  5 cm<sup>3</sup>), CH<sub>2</sub>Cl<sub>2</sub> (3  $\times$  5 cm<sup>3</sup>) and DMF (5  $\times$  5 cm<sup>3</sup>). The building block **1** (2 equiv) was combined with the resin twice, along with HBTU (2 equiv), HOBt (2 equiv) and DIPEA (4 equiv). The mixture was shaken for 2 h at room temperature, after which the resin was filtered and washed with DMF (3  $\times$  5 cm<sup>3</sup>), CH<sub>2</sub>Cl<sub>2</sub> (3  $\times$  5 cm<sup>3</sup>), methanol (3  $\times$  5 cm<sup>3</sup>), CH<sub>2</sub>Cl<sub>2</sub> (3  $\times$  5 cm<sup>3</sup>) and DMF (3  $\times$  5 cm<sup>3</sup>). The deprotection/coupling cycles were repeated in total twice, three, nine and ten times for **1a-d(CF<sub>3</sub>COOH)<sub>2n</sub>**, respectively. After removal of the final Fmoc protecting group with 30-min treatment with 20% piperidine in DMF (5 cm<sup>3</sup>) twice, the *N*-terminal of the resin-bound peptides were acetylated with Ac<sub>2</sub>O (3 equiv) and DIPEA (6 equiv) in DMF (5 cm<sup>3</sup>) by shaking for 2 h at room temperature. Then the resin was filtered and washed with DMF (3  $\times$  5 cm<sup>3</sup>), CH<sub>2</sub>Cl<sub>2</sub> (3  $\times$  5 cm<sup>3</sup>), methanol (3  $\times$  5 cm<sup>3</sup>) and CH<sub>2</sub>Cl<sub>2</sub> (3  $\times$  5 cm<sup>3</sup>) and finally dried *in vacuo*. Cleavage from the resin and deprotection of the Boc groups were carried out in standard cleavage cocktail (TFA/triisopropylsilane/water (95:2.5:2.5), 5 cm<sup>3</sup>) for 4 h at room temperature. The resin was filtered off and the resulting filtrate was poured into cold diethyl ether (50

cm<sup>3</sup>). The formed precipitation was isolated by centrifugation (3000 rpm) for 5 min and decantation and dried *in vacuo*. The crude peptides were purified by preparative RP-HPLC to give **1a-d**(CF<sub>3</sub>COOH)<sub>2n</sub> (**1a**; 81%, **1b**; 65%, **1c**; 61%, **1d**; 40%) as colorless syrup; δ<sub>H</sub>(500 MHz; CD<sub>3</sub>OD; Me<sub>4</sub>Si) for **1a** 4.64-4.10 (m, 8H, 2 × -OCH<sub>2</sub>CO-, 2 × -NCH<sub>2</sub>CO-), 3.88-3.81 (m, 4H), 3.78-3.76 (m, 2H), 3.69-3.52 (m, 26H), 3.51-3.47 (m, 2H), 3.44-3.34 (m, 8H), 1.95 (m, 3H, Ac), for **1b** 4.64-4.10 (m, 12H, 3 × -OCH<sub>2</sub>CO-, 3 × -NCH<sub>2</sub>CO-), 3.88-3.84 (m, 6H), 3.78-3.76 (m, 3H), 3.68-3.47 (m, 42H), 3.43-3.34 (m, 12H), 1.95 (m, 3H, Ac), for **1c** 4.63-4.09 (m, 36H, 9 × -OCH<sub>2</sub>CO-, 9 × -NCH<sub>2</sub>CO-), 3.85 (m, 16H), 3.76 (m, 10H), 3.68-3.53 (m, 114H), 3.51-3.47 (m, 13H), 3.42-3.35 (m, 36H), 1.95 (m, 3H, Ac), for **1d** 4.64-4.09 (m, 40H, 10 × -OCH<sub>2</sub>CO-, 10 × -NCH<sub>2</sub>CO-), 3.88-3.85 (m, 18H), 3.78 (m, 11H), 3.62-3.53 (m, 124H), 3.49-3.47 (m, 15H), 3.42-3.38 (m, 42H), 1.99-1.93 (m, 3H, Ac); *m/z* (ESI-TOF) for **1a** 806.46 (M + Na<sup>+</sup>. C<sub>40</sub>H<sub>69</sub>F<sub>12</sub>N<sub>9</sub>NaO<sub>21</sub> requires 806.46), for **1c** 416.02 (M - 18CF<sub>3</sub>COO<sup>-</sup> - 10H<sup>+</sup>. C<sub>137</sub>H<sub>275</sub>N<sub>37</sub>O<sub>55</sub> requires 416.01), for **1d** 737.45 (M - 20CF<sub>3</sub>COO<sup>-</sup> - 15H<sup>+</sup>. C<sub>152</sub>H<sub>305</sub>N<sub>41</sub>O<sub>61</sub> requires 737.45).

Preparative RP-HPLC was performed at room temperature with buffer *A* 0.1 vol% TFA in water, buffer *B* 0.1 vol% TFA in acetonitrile, a flow of 10 cm<sup>3</sup>/min, wavelength at 210 nm and a linear gradient from 0-80 vol% B (0-150 min). For analysis of **1a-d**(CF<sub>3</sub>COOH)<sub>2n</sub> to check their purity, analytical RP-HPLC was performed under the following condition: 30 °C, a linear gradient from 0-80 vol% B (0-150 min), buffer *A* 0.1 vol% TFA in water, buffer *B* 0.1 vol% TFA in acetonitrile, a flow of 0.7 cm<sup>3</sup>/min and UV detection at 210 nm. The retention time (*t<sub>R</sub>*) for **1a-d**(CF<sub>3</sub>COOH)<sub>2n</sub> were 27.5, 30.6, 35.8 and 36.2 min, respectively.

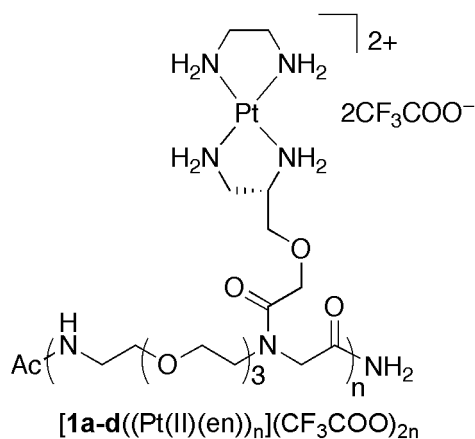

### Synthesis of Pt(II) complex-bearing peptides [1a-d(Pt(II)(en))<sub>n</sub>](CF<sub>3</sub>COO)<sub>2n</sub>: (n = 2, 3, 9, 10)

**1a-d**(CF<sub>3</sub>COOH)<sub>2n</sub>: (n = 2, 3, 9, 10) were neutralized by anion exchange column chromatography with water to give TFA-free peptides **1a-d** as a colorless syrup. To a solution of **1a-d** in ethanol was added [Pt(II)Br<sub>2</sub>(en)] (1.1n equiv) at room temperature. The suspension was heated at reflux for 12 h at

80 °C. The suspension was dissolved in water and filtered off with a membrane filter (hydrophilic, pore size; 0.45 μm). The solvent of the filtrate removed under reduced pressure and purified by RP-HPLC with acetonitrile/water containing 0.1% TFA to obtain [**1a-d**(Pt(II)(en))<sub>n</sub>](CF<sub>3</sub>COO)<sub>2n</sub> (**1a**; 75%, **1b**; 63%, **1c**; 26%, **1d**; 29% (2 steps)) as a colorless syrup (for [**1a**(Pt(II)(en))<sub>2</sub>](CF<sub>3</sub>COO)<sub>4</sub> Found: C, 29.99; H, 4.80; N, 10.22. C<sub>44</sub>H<sub>81</sub>F<sub>12</sub>N<sub>13</sub>O<sub>21</sub>Pt<sub>2</sub> requires C, 30.26; H, 4.68; N, 10.43, for [**1b**(Pt(II)(en))<sub>3</sub>](CF<sub>3</sub>COO)<sub>6</sub> Found: C, 29.31; H, 4.87; N, 10.04. C<sub>65</sub>H<sub>119</sub>F<sub>18</sub>N<sub>19</sub>O<sub>31</sub>Pt<sub>3</sub>·3H<sub>2</sub>O requires C, 29.53; H, 4.77; N, 10.07, for [**1c**(Pt(II)(en))<sub>9</sub>](CF<sub>3</sub>COO)<sub>18</sub> Found: C, 28.25; H, 5.09; N, 9.11. C<sub>191</sub>H<sub>347</sub>F<sub>54</sub>N<sub>55</sub>O<sub>91</sub>Pt<sub>9</sub>·27H<sub>2</sub>O requires C, 28.19; H, 4.97; N, 9.47, for [**1d**(Pt(II)(en))<sub>10</sub>](CF<sub>3</sub>COO)<sub>20</sub> Found: C, 27.82; H, 5.20; N, 9.00. C<sub>212</sub>H<sub>385</sub>F<sub>60</sub>N<sub>61</sub>O<sub>101</sub>Pt<sub>10</sub>·30H<sub>2</sub>O requires C, 28.18; H, 4.96; N, 9.46); δ<sub>H</sub>(500 MHz; CD<sub>3</sub>OD; Me<sub>4</sub>Si) for [**1a**(Pt(II)(en))<sub>2</sub>](CF<sub>3</sub>COO)<sub>4</sub> 4.50-4.02 (m, 8H, 2 × -OCH<sub>2</sub>CO-, 2 × -NCH<sub>2</sub>CO-), 3.75-3.67 (m, 4H, 2 × NH<sub>2</sub>CHCH<sub>2</sub>O-), 3.63-3.35 (m, 32H, 2 × -OCH<sub>2</sub>CH<sub>2</sub>N-, 2 × -OCH<sub>2</sub>CH<sub>2</sub>OCH<sub>2</sub>CH<sub>2</sub>O-, 2 × -NHCH<sub>2</sub>CH<sub>2</sub>O-), 3.09 (br, 2H, 2 × NH<sub>2</sub>CH-), 2.78-2.75 (m, 2H, 2 × NH<sub>2</sub>CHHCH-), 2.69-2.62 (m, 10H, 2 × NH<sub>2</sub>CHHCH-, 2 × NH<sub>2</sub>CH<sub>2</sub>CH<sub>2</sub>NH<sub>2</sub>), 1.96-1.95 (m, 3H, Ac), for [**1b**(Pt(II)(en))<sub>3</sub>](CF<sub>3</sub>COO)<sub>6</sub> 4.50-4.03 (m, 12H, 3 × -OCH<sub>2</sub>CO-, 3 × -NCH<sub>2</sub>CO-), 3.73-3.67 (m, 6H, 3 × NH<sub>2</sub>CHCH<sub>2</sub>O-), 3.63-3.35 (m, 48H, 3 × -OCH<sub>2</sub>CH<sub>2</sub>N-, 3 × -OCH<sub>2</sub>CH<sub>2</sub>OCH<sub>2</sub>CH<sub>2</sub>O-, 3 × -NHCH<sub>2</sub>CH<sub>2</sub>O-), 3.09 (br, 3H, 3 × NH<sub>2</sub>CH-), 2.78-2.76 (m, 3H, 3 × NH<sub>2</sub>CHHCH-), 2.69-2.60 (m, 15H, 3 × NH<sub>2</sub>CHHCH-, 3 × NH<sub>2</sub>CH<sub>2</sub>CH<sub>2</sub>NH<sub>2</sub>), 1.96-1.94 (m, 3H, Ac), for [**1c**(Pt(II)(en))<sub>9</sub>](CF<sub>3</sub>COO)<sub>18</sub> 4.50-4.03 (m, 36H, 9 × -OCH<sub>2</sub>CO-, 9 × -NCH<sub>2</sub>CO-), 3.76-3.73 (m, 18H, 9 × NH<sub>2</sub>CHCH<sub>2</sub>O-), 3.63-3.35 (m, 144H, 9 × -OCH<sub>2</sub>CH<sub>2</sub>N-, 9 × -OCH<sub>2</sub>CH<sub>2</sub>OCH<sub>2</sub>CH<sub>2</sub>O-, 9 × -NHCH<sub>2</sub>CH<sub>2</sub>O-), 3.08 (br, 9H, 9 × NH<sub>2</sub>CH-), 2.77 (br, 9H, 9 × NH<sub>2</sub>CHHCH-), 2.62 (m, 45H, 9 × NH<sub>2</sub>CHHCH-, 9 × NH<sub>2</sub>CH<sub>2</sub>CH<sub>2</sub>NH<sub>2</sub>), 1.96-1.94 (m, 3H, Ac), for [**1d**(Pt(II)(en))<sub>10</sub>](CF<sub>3</sub>COO)<sub>20</sub> 4.50-4.03 (m, 40H, 10 × -OCH<sub>2</sub>CO-, 10 × -NCH<sub>2</sub>CO-), 3.76-3.69 (m, 20H, 10 × NH<sub>2</sub>CHCH<sub>2</sub>O-), 3.63-3.34 (m, 160H, 10 × -OCH<sub>2</sub>CH<sub>2</sub>N-, 10 × -OCH<sub>2</sub>CH<sub>2</sub>OCH<sub>2</sub>CH<sub>2</sub>O-, 10 × -NHCH<sub>2</sub>CH<sub>2</sub>O-), 3.10 (br, 10H, 10 × NH<sub>2</sub>CH-), 2.76 (br, 10H, 10 × NH<sub>2</sub>CHHCH-), 2.62 (m, 50H, 10 × NH<sub>2</sub>CHHCH-, 10 × NH<sub>2</sub>CH<sub>2</sub>CH<sub>2</sub>NH<sub>2</sub>), 1.99-1.93 (m, 3H, Ac); *m/z* (ESI-TOF) for [**1a**(Pt(II)(en))<sub>2</sub>](CF<sub>3</sub>COO)<sub>4</sub> 759.71 (M - 2CF<sub>3</sub>COO<sup>-</sup>. C<sub>40</sub>H<sub>79</sub>F<sub>6</sub>N<sub>13</sub>O<sub>17</sub>Pt<sub>2</sub> requires 759.75), for [**1b**(Pt(II)(en))<sub>3</sub>](CF<sub>3</sub>COO)<sub>6</sub> 1181.80 (M - 2CF<sub>3</sub>COO<sup>-</sup>. C<sub>61</sub>H<sub>117</sub>F<sub>12</sub>N<sub>19</sub>O<sub>27</sub>Pt<sub>3</sub> requires 1181.86), for [**1c**(Pt(II)(en))<sub>9</sub>](CF<sub>3</sub>COO)<sub>18</sub> 1162.28 (M - 6CF<sub>3</sub>COO<sup>-</sup>. C<sub>179</sub>H<sub>341</sub>F<sub>36</sub>N<sub>55</sub>O<sub>79</sub>Pt<sub>9</sub> requires 1162.19), for [**1d**(Pt(II)(en))<sub>10</sub>](CF<sub>3</sub>COO)<sub>20</sub> 1302.89 (M - 6CF<sub>3</sub>COO<sup>-</sup>. C<sub>200</sub>H<sub>379</sub>F<sub>42</sub>N<sub>61</sub>O<sub>89</sub>Pt<sub>10</sub> requires 1302.89); *t<sub>R</sub>* for [**1a**(Pt(II)(en))<sub>2</sub>](CF<sub>3</sub>COO)<sub>4</sub> 29.2, for [**1b**(Pt(II)(en))<sub>3</sub>](CF<sub>3</sub>COO)<sub>6</sub> 34.3, for [**1c**(Pt(II)(en))<sub>9</sub>](CF<sub>3</sub>COO)<sub>18</sub> 37.7, for [**1d**(Pt(II)(en))<sub>10</sub>](CF<sub>3</sub>COO)<sub>20</sub> 38.9 min (the same condition mentioned above).

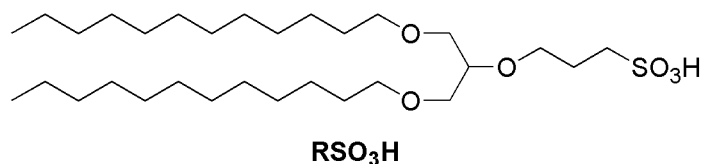

### Synthesis of 3-[1,3-bis(dodecyloxy)-2-propoxy]propanesulfonic acid RSO<sub>3</sub>H

To a suspension of sodium hydride (in oil (60%), 186 mg, 4.66 mmol) in THF (2.3 cm<sup>3</sup>) was added slowly dropwise a solution of 1,3-bis-dodecyloxy-propan-2-ol (1.00 g, 2.33 mmol) in THF (2.3 cm<sup>3</sup>) at room temperature with a cannula under a nitrogen atmosphere. After stirring for 30 min at 55 °C, 1,3-propanesultone (246 mm<sup>3</sup>, 2.80 mmol) was added dropwise within 3 min, and then stirred for 1 h at 55 °C. The reaction was quenched by adding 0.5 cm<sup>3</sup> of methanol, and then the reaction mixture was poured into cooled 1 M HCl/brine (300 cm<sup>3</sup>). The target compound was extracted with ethyl acetate (300 cm<sup>3</sup>), and then the solvent was removed under reduced pressure and dried *in vacuo*. The crude material (1.56 g) was purified by silica gel column chromatography with *n*-hexane/ethyl acetate (10:1 - 2:1) to afford RSO<sub>3</sub>H (1.08 g, 85%) as a pale yellow syrup; *R<sub>f</sub>* 0.68 (ethyl acetate/methanol (3:1));  $\delta_{\text{H}}$ (500 MHz; CD<sub>3</sub>OD; Me<sub>4</sub>Si) 3.70 (t, *J* = 6.2 Hz, 2H, -CH<sub>2</sub>SO<sub>3</sub>H), 3.58 (m, 1H, methine), 3.53-3.42 (m, 8H, 2 × -CH<sub>2</sub>OCH<sub>2</sub>-), 2.90 (m, 2H, -CH<sub>2</sub>CH<sub>2</sub>CH<sub>2</sub>SO<sub>3</sub>H), 2.02 (m, 2H, -CH<sub>2</sub>CH<sub>2</sub>SO<sub>3</sub>H), 1.56 (m, 4H, 2 × -CH<sub>2</sub>CH<sub>2</sub>OCH<sub>2</sub>CH-), 1.37-1.17 (m, 36H, 2 × CH<sub>3</sub>(CH<sub>2</sub>)<sub>9</sub>-), 0.90 (t, *J* = 6.9 Hz, 6H, 2 × CH<sub>3</sub>(CH<sub>2</sub>)<sub>9</sub>-); *m/z* (ESI-TOF) 551.49 (M + H<sup>+</sup>. C<sub>30</sub>H<sub>63</sub>O<sub>6</sub>S requires 551.43).

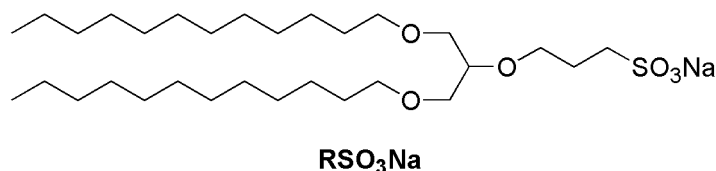

### Synthesis of sodium 3-[1,3-bis(dodecyloxy)-2-propoxy]propanesulfonate RSO<sub>3</sub>Na

To a solution of RSO<sub>3</sub>H (570 mg, 1.03 mmol) in methanol (1.0 cm<sup>3</sup>) was added a solution of NaOH (42.0 mg, 1.05 mmol) in methanol (1.0 cm<sup>3</sup>) at room temperature. The resulting precipitate was dissolved in methanol and the remaining insoluble matter was filtered off. The solvent of the filtrate was removed under reduced pressure and dried *in vacuo*. The crude material (611 mg) was purified by recrystallization with methanol/2-propanol (1:1, 5 cm<sup>3</sup>) to afford RSO<sub>3</sub>Na (357 mg, 60%) as a colorless liquid (Found: C, 62.68; H, 10.93. C<sub>30</sub>H<sub>61</sub>NaO<sub>6</sub>S requires C, 62.90; H, 10.73);  $\delta_{\text{H}}$ (500 MHz; CD<sub>3</sub>OD; Me<sub>4</sub>Si) 3.70 (t, *J* = 6.2 Hz, 2H, -CH<sub>2</sub>SO<sub>3</sub>Na), 3.58 (m, 1H, methine), 3.53-3.42 (m, 8H, 2 × -CH<sub>2</sub>OCH<sub>2</sub>-), 2.89 (m, 2H, -CH<sub>2</sub>CH<sub>2</sub>CH<sub>2</sub>SO<sub>3</sub>Na), 2.02 (m, 2H, -CH<sub>2</sub>CH<sub>2</sub>SO<sub>3</sub>Na), 1.56 (m, 4H, 2 × -CH<sub>2</sub>CH<sub>2</sub>OCH<sub>2</sub>CH-), 1.37-1.29 (m, 36H, 2 × CH<sub>3</sub>(CH<sub>2</sub>)<sub>9</sub>-), 0.90 (t, *J* = 6.9 Hz, 6H, 2 × CH<sub>3</sub>(CH<sub>2</sub>)<sub>9</sub>-); *m/z* (ESI-TOF) 595.48 (M + Na<sup>+</sup>. C<sub>30</sub>H<sub>61</sub>Na<sub>2</sub>O<sub>6</sub>S requires 595.40).

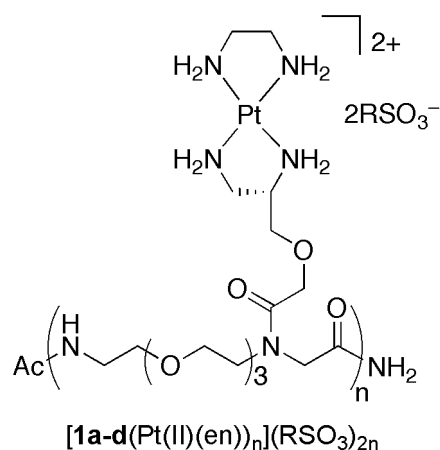

### Synthesis of Pt(II) complex-bearing peptides [1a-d(Pt(II)(en))<sub>n</sub>](RSO<sub>3</sub>)<sub>2n</sub>: (n = 2, 3, 9, 10)

To a solution of [1a-d(Pt(II)(en))<sub>n</sub>](CF<sub>3</sub>COO)<sub>2n</sub>: (n = 2, 3, 9, 10) in methanol was added RSO<sub>3</sub>Na (2n equiv) at room temperature. After stirring for 12 h at room temperature, the solvent was removed under reduced pressure and dried *in vacuo*. The residue was washed with water (3 times), reprecipitated with methanol/acetone or dichloromethane/acetone and lyophilized to obtain [1a-d(Pt(II)(en))<sub>n</sub>](RSO<sub>3</sub>)<sub>2n</sub> (**1a**; 94%, **1b**; 48%, **1c**; 94%, **1d**; 72%) as a colorless foam (for [1a(Pt(II)(en))<sub>2</sub>](RSO<sub>3</sub>)<sub>4</sub> Found: C, 53.41; H, 9.61; N, 4.92. C<sub>156</sub>H<sub>325</sub>N<sub>13</sub>O<sub>37</sub>Pt<sub>2</sub>S<sub>4</sub> requires C, 53.63; H, 9.38; N, 5.21, for [1b(Pt(II)(en))<sub>3</sub>](RSO<sub>3</sub>)<sub>6</sub> Found: C, 53.70; H, 9.38; N, 5.11. C<sub>233</sub>H<sub>485</sub>N<sub>19</sub>O<sub>55</sub>Pt<sub>3</sub>S<sub>6</sub> requires C, 53.56; H, 9.67; N, 4.87, for [1c(Pt(II)(en))<sub>9</sub>](RSO<sub>3</sub>)<sub>18</sub> Found: C, 52.50; H, 9.35; N, 4.73. C<sub>695</sub>H<sub>1445</sub>N<sub>55</sub>O<sub>163</sub>Pt<sub>9</sub>S<sub>18</sub>·21H<sub>2</sub>O requires C, 52.52; H, 9.43; N, 4.85, for [1d(Pt(II)(en))<sub>10</sub>](RSO<sub>3</sub>)<sub>20</sub> Found: C, 53.65; H, 9.65; N, 4.74. C<sub>772</sub>H<sub>1605</sub>N<sub>61</sub>O<sub>181</sub>Pt<sub>10</sub>S<sub>20</sub> requires C, 53.81; H, 9.39; N, 4.96); δ<sub>H</sub>(500 MHz; CD<sub>3</sub>OD; Me<sub>4</sub>Si) for [1a(Pt(II)(en))<sub>2</sub>](RSO<sub>3</sub>)<sub>4</sub> 4.51-4.02 (m, 8H, 2 × -NCH<sub>2</sub>CO-, 2 × -OCH<sub>2</sub>CO-), 3.77-3.69 (m, 12H, 2 × -OCH<sub>2</sub>CHNH<sub>2</sub>, 4 × -CH<sub>2</sub>SO<sub>3</sub>), 3.64-3.41 (m, 68H, 2 × -OCH<sub>2</sub>CH<sub>2</sub>N-, 2 × -OCH<sub>2</sub>CH<sub>2</sub>OCH<sub>2</sub>CH<sub>2</sub>O-, 2 × -NHCH<sub>2</sub>CH<sub>2</sub>O-, 8 × -OCH<sub>2</sub>CHO- (RSO<sub>3</sub>), 4 × -OCH<sub>2</sub>CHO- (RSO<sub>3</sub>), 8 × -CH<sub>2</sub>OCH<sub>2</sub>CHO- (RSO<sub>3</sub>)), 3.11 (br, 2H, 2 × -OCH<sub>2</sub>CHNH<sub>2</sub>), 2.93-2.89 (m, 8H, 4 × -CH<sub>2</sub>CH<sub>2</sub>CH<sub>2</sub>SO<sub>3</sub>), 2.79-2.77 (br, 2H, 2 × -CHCHHNH<sub>2</sub>), 2.69-2.63 (m, 10H, 2 × -CHCHHNH<sub>2</sub>, 2 × NH<sub>2</sub>CH<sub>2</sub>CH<sub>2</sub>NH<sub>2</sub>), 2.07-2.01 (m, 8H, 4 × -CH<sub>2</sub>CH<sub>2</sub>SO<sub>3</sub>), 1.96 (m, 3H, Ac), 1.59-1.54 (m, 16H, 8 × -CH<sub>2</sub>CH<sub>2</sub>OCH<sub>2</sub>CHO-), 1.35-1.30 (m, 144H, 8 × CH<sub>3</sub>(CH<sub>2</sub>)<sub>9</sub>-), 0.90 (m, 24H, 8 × CH<sub>3</sub>(CH<sub>2</sub>)<sub>9</sub>-), for [1b(Pt(II)(en))<sub>3</sub>](RSO<sub>3</sub>)<sub>6</sub> 4.51-4.01 (m, 12H, 3 × -NCH<sub>2</sub>CO-, 3 × -OCH<sub>2</sub>CO-), 3.75-3.69 (m, 18H, 3 × -OCH<sub>2</sub>CHNH<sub>2</sub>, 6 × -CH<sub>2</sub>SO<sub>3</sub>), 3.64-3.41 (m, 102H, 3 × -OCH<sub>2</sub>CH<sub>2</sub>N-, 3 × -OCH<sub>2</sub>CH<sub>2</sub>OCH<sub>2</sub>CH<sub>2</sub>O-, 3 × -NHCH<sub>2</sub>CH<sub>2</sub>O-, 12 × -OCH<sub>2</sub>CHO- (RSO<sub>3</sub>), 6 × -OCH<sub>2</sub>CHO- (RSO<sub>3</sub>), 12 × -CH<sub>2</sub>OCH<sub>2</sub>CHO- (RSO<sub>3</sub>)), 3.10 (br, 3H, 3 × -OCH<sub>2</sub>CHNH<sub>2</sub>), 2.92-2.89 (m, 12H, 6 × -CH<sub>2</sub>CH<sub>2</sub>CH<sub>2</sub>SO<sub>3</sub>), 2.77 (br, 3H, 3 × -CHCHHNH<sub>2</sub>), 2.69-2.63 (m, 15H, 3 × -CHCHHNH<sub>2</sub>, 3 × NH<sub>2</sub>CH<sub>2</sub>CH<sub>2</sub>NH<sub>2</sub>), 2.06-2.01 (m, 12H, 6 × -CH<sub>2</sub>CH<sub>2</sub>SO<sub>3</sub>), 1.96-1.95 (m, 3H, Ac), 1.59-1.53 (m, 24H, 12 × -CH<sub>2</sub>CH<sub>2</sub>OCH<sub>2</sub>CHO-), 1.35-1.29 (m, 216H, 12 × CH<sub>3</sub>(CH<sub>2</sub>)<sub>9</sub>-), 0.90 (m, 36H, 12 × CH<sub>3</sub>(CH<sub>2</sub>)<sub>9</sub>-),



for **[1c(Pt(II)(en))<sub>9</sub>](RSO<sub>3</sub>)<sub>18</sub>** 4.53-4.07 (m, 36H, 9 × -NCH<sub>2</sub>CO-, 9 × -OCH<sub>2</sub>CO-), 3.75-3.70 (m, 54H, 9 × -OCH<sub>2</sub>CHNH<sub>2</sub>, 18 × -CH<sub>2</sub>SO<sub>3</sub>), 3.64-3.42 (m, 306H, 9 × -OCH<sub>2</sub>CH<sub>2</sub>N-, 9 × -OCH<sub>2</sub>CH<sub>2</sub>OCH<sub>2</sub>CH<sub>2</sub>O-, 9 × -NHCH<sub>2</sub>CH<sub>2</sub>O-, 36 × -OCH<sub>2</sub>CHO- (RSO<sub>3</sub>), 18 × -OCH<sub>2</sub>CHO- (RSO<sub>3</sub>), 36 × -CH<sub>2</sub>OCH<sub>2</sub>CHO- (RSO<sub>3</sub>)), 3.13 (br, 9H, 9 × -OCH<sub>2</sub>CHNH<sub>2</sub>), 2.94-2.90 (m, 36H, 18 × -CH<sub>2</sub>CH<sub>2</sub>CH<sub>2</sub>SO<sub>3</sub>), 2.79 (br, 9H, 9 × -CHCHH<sub>2</sub>NH<sub>2</sub>), 2.69-2.64 (m, 45H, 9 × -CHCHH<sub>2</sub>NH<sub>2</sub>, 9 × NH<sub>2</sub>CH<sub>2</sub>CH<sub>2</sub>NH<sub>2</sub>), 2.08-2.02 (m, 36H, 18 × -CH<sub>2</sub>CH<sub>2</sub>SO<sub>3</sub>), 1.96-1.91 (m, 3H, Ac), 1.59-1.54 (m, 72H, 36 × -CH<sub>2</sub>CH<sub>2</sub>OCH<sub>2</sub>CHO-), 1.35-1.29 (m, 648H, 36 × CH<sub>3</sub>(CH<sub>2</sub>)<sub>9</sub>-), 0.92-0.89 (m, 108H, 36 × CH<sub>3</sub>(CH<sub>2</sub>)<sub>9</sub>-), for **[1d(Pt(II)(en))<sub>10</sub>](RSO<sub>3</sub>)<sub>20</sub>** 4.53-4.07 (m, 40H, 10 × -NCH<sub>2</sub>CO-, 10 × -OCH<sub>2</sub>CO-), 3.75-3.70 (m, 60H, 10 × -OCH<sub>2</sub>CHNH<sub>2</sub>, 20 × -CH<sub>2</sub>SO<sub>3</sub>), 3.64-3.42 (m, 340H, 10 × -OCH<sub>2</sub>CH<sub>2</sub>N-, 10 × -OCH<sub>2</sub>CH<sub>2</sub>OCH<sub>2</sub>CH<sub>2</sub>O-, 10 × -NHCH<sub>2</sub>CH<sub>2</sub>O-, 40 × -OCH<sub>2</sub>CHO- (RSO<sub>3</sub>), 20 × -OCH<sub>2</sub>CHO- (RSO<sub>3</sub>), 40 × -CH<sub>2</sub>OCH<sub>2</sub>CHO- (RSO<sub>3</sub>)), 3.14 (br, 10H, 10 × -OCH<sub>2</sub>CHNH<sub>2</sub>), 2.94-2.91 (m, 40H, 20 × -CH<sub>2</sub>CH<sub>2</sub>CH<sub>2</sub>SO<sub>3</sub>), 2.80 (br, 10H, 10 × -CHCHH<sub>2</sub>NH<sub>2</sub>), 2.64 (m, 50H, 10 × -CHCHH<sub>2</sub>NH<sub>2</sub>, 10 × NH<sub>2</sub>CH<sub>2</sub>CH<sub>2</sub>NH<sub>2</sub>), 2.08-2.02 (m, 40H, 20 × -CH<sub>2</sub>CH<sub>2</sub>SO<sub>3</sub>), 1.96-1.91 (m, 3H, Ac), 1.59-1.54 (m, 80H, 40 × -CH<sub>2</sub>CH<sub>2</sub>OCH<sub>2</sub>CHO-), 1.35-1.30 (m, 720H, 40 × CH<sub>3</sub>(CH<sub>2</sub>)<sub>9</sub>-), 0.90 (m, 120H, 40 × CH<sub>3</sub>(CH<sub>2</sub>)<sub>9</sub>-); *m/z* (ESI-TOF) for **[1a(Pt(II)(en))<sub>2</sub>](RSO<sub>3</sub>)<sub>4</sub>** 1196.84 (M - 2RSO<sub>3</sub><sup>-</sup>. C<sub>96</sub>H<sub>201</sub>N<sub>13</sub>NaO<sub>25</sub>Pt<sub>2</sub>S<sub>2</sub> requires 1196.69), for **[1b(Pt(II)(en))<sub>3</sub>](RSO<sub>3</sub>)<sub>6</sub>** 1187.02 (M - 3RSO<sub>3</sub><sup>-</sup>. C<sub>143</sub>H<sub>299</sub>N<sub>19</sub>O<sub>37</sub>Pt<sub>3</sub>S<sub>3</sub> requires 1187.02).

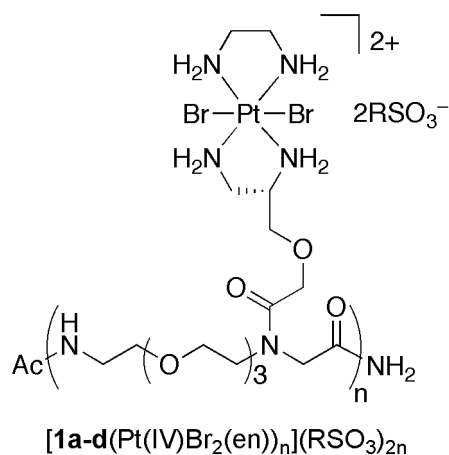

### Synthesis of Pt(IV) complex-bearing peptides **[1a-d(Pt(IV)Br<sub>2</sub>(en))<sub>n</sub>](RSO<sub>3</sub>)<sub>2n</sub>**: (n = 2, 3, 9, 10)

To a solution of **[1a-d(Pt(II)(en))<sub>n</sub>](CF<sub>3</sub>COO)<sub>2n</sub>**: (n = 2, 3, 9, 10) in ethanol was added excess bromine at room temperature. After stirring for 15 min at room temperature, the solvent and excess bromine were removed under reduced pressure and dried *in vacuo*. To the residue was added a solution of RSO<sub>3</sub>Na (2n equiv) in methanol. After stirring for 4 h at room temperature, the solvent was removed under reduced pressure and dried *in vacuo*. The residue was washed with water (8 times) and lyophilized. The crude material was purified by reprecipitation with acetone/methanol,

methanol/diethyl ether or dichloromethane/diethyl ether to afford [**1a-d**(Pt(IV)Br<sub>2</sub>(en))<sub>n</sub>](RSO<sub>3</sub>)<sub>2n</sub> (**1a**; 49%, **1b**; 65%, **1c**; 82%, **1d**; 76% (2 steps)) as a yellow foam (for [**1a**(Pt(IV)Br<sub>2</sub>(en))<sub>2</sub>](RSO<sub>3</sub>)<sub>4</sub> Found: C, 48.88; H, 8.71; N, 4.54. C<sub>156</sub>H<sub>325</sub>Br<sub>4</sub>N<sub>13</sub>O<sub>37</sub>Pt<sub>2</sub>S<sub>4</sub> requires C, 49.13; H, 8.59; N, 4.77, for [**1b**(Pt(IV)Br<sub>2</sub>(en))<sub>3</sub>](RSO<sub>3</sub>)<sub>6</sub> Found: C, 49.00; H, 8.83; N, 4.47. C<sub>233</sub>H<sub>486</sub>Br<sub>6</sub>N<sub>19</sub>O<sub>55</sub>Pt<sub>3</sub>S<sub>6</sub> requires C, 49.18; H, 8.59; N, 4.68, for [**1c**(Pt(IV)Br<sub>2</sub>(en))<sub>9</sub>](RSO<sub>3</sub>)<sub>18</sub> Found: C, 47.94; H, 8.72; N, 4.44. C<sub>695</sub>H<sub>1445</sub>Br<sub>18</sub>N<sub>55</sub>O<sub>163</sub>Pt<sub>9</sub>S<sub>18</sub>·27H<sub>2</sub>O requires C, 47.86; H, 8.66; N, 4.42, for [**1d**(Pt(IV)Br<sub>2</sub>(en))<sub>10</sub>](RSO<sub>3</sub>)<sub>20</sub> Found: C, 49.02; H, 8.64; N, 4.37. C<sub>772</sub>H<sub>1605</sub>Br<sub>20</sub>N<sub>61</sub>O<sub>181</sub>Pt<sub>10</sub>S<sub>20</sub> requires C, 49.24; H, 8.59; N, 4.54); δ<sub>H</sub>(500 MHz; CD<sub>3</sub>OD; Me<sub>4</sub>Si) for [**1a**(Pt(IV)Br<sub>2</sub>(en))<sub>2</sub>](RSO<sub>3</sub>)<sub>4</sub> 4.61-4.10 (m, 8H, 2 × -NCH<sub>2</sub>CO-, 2 × -OCH<sub>2</sub>CO-), 3.94-3.91 (m, 2H, 2 × -OCHHCHNH<sub>2</sub>), 3.78-3.75 (m, 2H, 2 × -OCHHCHNH<sub>2</sub>), 3.70 (t, *J* = 6.2 Hz, 8H, 4 × -CH<sub>2</sub>SO<sub>3</sub>), 3.63-3.39 (m, 70H, 2 × -OCH<sub>2</sub>CHNH<sub>2</sub>, 2 × -OCH<sub>2</sub>CH<sub>2</sub>N-, 2 × -OCH<sub>2</sub>CH<sub>2</sub>OCH<sub>2</sub>CH<sub>2</sub>O-, 2 × -NHCH<sub>2</sub>CH<sub>2</sub>O-, 8 × -OCH<sub>2</sub>CHO- (RSO<sub>3</sub>), 4 × -OCH<sub>2</sub>CHO- (RSO<sub>3</sub>), 8 × -CH<sub>2</sub>OCH<sub>2</sub>CHO- (RSO<sub>3</sub>)), 3.31-3.30 (2H, 2 × -CHCHHNNH<sub>2</sub>), 3.07-2.96 (m, 10H, 2 × -CHCHHNNH<sub>2</sub>, 2 × NH<sub>2</sub>CH<sub>2</sub>CH<sub>2</sub>NH<sub>2</sub>), 2.91-2.88 (m, 8H, 4 × -CH<sub>2</sub>CH<sub>2</sub>CH<sub>2</sub>SO<sub>3</sub>), 2.05-1.99 (m, 8H, 4 × -CH<sub>2</sub>CH<sub>2</sub>SO<sub>3</sub>), 1.96-1.95 (m, 3H, Ac), 1.59-1.53 (m, 16H, 8 × -CH<sub>2</sub>CH<sub>2</sub>OCH<sub>2</sub>CHO-), 1.39-1.29 (m, 144H, 8 × CH<sub>3</sub>(CH<sub>2</sub>)<sub>9</sub>-), 0.90 (m, 24H, 8 × CH<sub>3</sub>(CH<sub>2</sub>)<sub>9</sub>-), for [**1b**(Pt(IV)Br<sub>2</sub>(en))<sub>3</sub>](RSO<sub>3</sub>)<sub>6</sub> 4.63-4.11 (m, 12H, 3 × -NCH<sub>2</sub>CO-, 3 × -OCH<sub>2</sub>CO-), 3.93 (br, 3H, 3 × -OCHHCHNH<sub>2</sub>), 3.78-3.76 (m, 3H, 3 × -OCHHCHNH<sub>2</sub>), 3.70 (t, *J* = 6.2 Hz, 12H, 6 × -CH<sub>2</sub>SO<sub>3</sub>), 3.63-3.39 (m, 105H, 3 × -OCH<sub>2</sub>CHNH<sub>2</sub>, 3 × -OCH<sub>2</sub>CH<sub>2</sub>N-, 3 × -OCH<sub>2</sub>CH<sub>2</sub>OCH<sub>2</sub>CH<sub>2</sub>O-, 3 × -NHCH<sub>2</sub>CH<sub>2</sub>O-, 12 × -OCH<sub>2</sub>CHO- (RSO<sub>3</sub>), 6 × -OCH<sub>2</sub>CHO- (RSO<sub>3</sub>), 12 × -CH<sub>2</sub>OCH<sub>2</sub>CHO- (RSO<sub>3</sub>)), 3.31-3.30 (3H, 3 × -CHCHHNNH<sub>2</sub>), 3.07-2.98 (m, 15H, 3 × -CHCHHNNH<sub>2</sub>, 3 × NH<sub>2</sub>CH<sub>2</sub>CH<sub>2</sub>NH<sub>2</sub>), 2.91-2.88 (m, 12H, 6 × -CH<sub>2</sub>CH<sub>2</sub>CH<sub>2</sub>SO<sub>3</sub>), 2.05-1.99 (m, 12H, 6 × -CH<sub>2</sub>CH<sub>2</sub>SO<sub>3</sub>), 1.96-1.95 (m, 3H, Ac), 1.58-1.53 (m, 24H, 12 × -CH<sub>2</sub>CH<sub>2</sub>OCH<sub>2</sub>CHO-), 1.35-1.29 (m, 216H, 12 × CH<sub>3</sub>(CH<sub>2</sub>)<sub>9</sub>-), 0.91-0.88 (m, 36H, 12 × CH<sub>3</sub>(CH<sub>2</sub>)<sub>9</sub>-), for [**1c**(Pt(IV)Br<sub>2</sub>(en))<sub>9</sub>](RSO<sub>3</sub>)<sub>18</sub> 4.62-4.11 (m, 36H, 9 × -NCH<sub>2</sub>CO-, 9 × -OCH<sub>2</sub>CO-), 3.93 (br, 9H, 9 × -OCHHCHNH<sub>2</sub>), 3.79-3.77 (m, 9H, 9 × -OCHHCHNH<sub>2</sub>), 3.70 (t, *J* = 6.2 Hz, 36H, 18 × -CH<sub>2</sub>SO<sub>3</sub>), 3.63-3.39 (m, 315H, 9 × -OCH<sub>2</sub>CHNH<sub>2</sub>, 9 × -OCH<sub>2</sub>CH<sub>2</sub>N-, 9 × -OCH<sub>2</sub>CH<sub>2</sub>OCH<sub>2</sub>CH<sub>2</sub>O-, 9 × -NHCH<sub>2</sub>CH<sub>2</sub>O-, 36 × -OCH<sub>2</sub>CHO- (RSO<sub>3</sub>), 18 × -OCH<sub>2</sub>CHO- (RSO<sub>3</sub>), 36 × -CH<sub>2</sub>OCH<sub>2</sub>CHO- (RSO<sub>3</sub>)), 3.31-3.30 (9H, 9 × -CHCHHNNH<sub>2</sub>), 3.07-3.00 (m, 45H, 9 × -CHCHHNNH<sub>2</sub>, 9 × NH<sub>2</sub>CH<sub>2</sub>CH<sub>2</sub>NH<sub>2</sub>), 2.92-2.89 (m, 36H, 18 × -CH<sub>2</sub>CH<sub>2</sub>CH<sub>2</sub>SO<sub>3</sub>), 2.05-1.99 (m, 36H, 18 × -CH<sub>2</sub>CH<sub>2</sub>SO<sub>3</sub>), 1.96-1.95 (m, 3H, Ac), 1.59-1.53 (m, 72H, 36 × -CH<sub>2</sub>CH<sub>2</sub>OCH<sub>2</sub>CHO-), 1.35-1.29 (m, 648H, 36 × CH<sub>3</sub>(CH<sub>2</sub>)<sub>9</sub>-), 0.90 (m, 108H, 36 × CH<sub>3</sub>(CH<sub>2</sub>)<sub>9</sub>-), for [**1d**(Pt(IV)Br<sub>2</sub>(en))<sub>10</sub>](RSO<sub>3</sub>)<sub>20</sub> 4.62-4.13 (m, 40H, 10 × -NCH<sub>2</sub>CO-, 10 × -OCH<sub>2</sub>CO-), 3.93 (br, 10H, 10 × -OCHHCHNH<sub>2</sub>), 3.79 (br, 10H, 10 × -OCHHCHNH<sub>2</sub>), 3.70 (t, *J* = 6.2 Hz, 40H, 20 × -CH<sub>2</sub>SO<sub>3</sub>), 3.63-3.39 (m, 350H, 10 × -OCH<sub>2</sub>CHNH<sub>2</sub>, 10 × -OCH<sub>2</sub>CH<sub>2</sub>N-, 10 × -OCH<sub>2</sub>CH<sub>2</sub>OCH<sub>2</sub>CH<sub>2</sub>O-, 10 × -NHCH<sub>2</sub>CH<sub>2</sub>O-, 40 × -OCH<sub>2</sub>CHO- (RSO<sub>3</sub>), 20 × -OCH<sub>2</sub>CHO- (RSO<sub>3</sub>), 40 × -CH<sub>2</sub>OCH<sub>2</sub>CHO- (RSO<sub>3</sub>)), 3.31-3.30 (10H, 10 × -CHCHHNNH<sub>2</sub>), 3.06-2.96 (m, 50H, 10 × -CHCHHNNH<sub>2</sub>, 10 × NH<sub>2</sub>CH<sub>2</sub>CH<sub>2</sub>NH<sub>2</sub>),

2.91-2.88 (m, 40H,  $20 \times -CH_2CH_2CH_2SO_3$ ), 2.05-1.98 (m, 40H,  $20 \times -CH_2CH_2SO_3$ ), 1.96-1.95 (m, 3H, Ac), 1.59-1.53 (m, 80H,  $40 \times -CH_2CH_2OCH_2CHO-$ ), 1.35-1.29 (m, 720H,  $40 \times CH_3(CH_2)_9-$ ), 0.90 (m, 120H,  $40 \times CH_3(CH_2)_9-$ );  $m/z$  (ESI-TOF) for **[1a(Pt(IV)Br<sub>2</sub>(en)<sub>2</sub>)](RSO<sub>3</sub>)<sub>4</sub>** 1356.67 (M - 2RSO<sub>3</sub><sup>-</sup>, C<sub>96</sub>H<sub>201</sub>Br<sub>4</sub>N<sub>13</sub>NaO<sub>25</sub>Pt<sub>2</sub>S<sub>2</sub> requires 1356.52), for **[1b(Pt(IV)Br<sub>2</sub>(en)<sub>3</sub>)](RSO<sub>3</sub>)<sub>6</sub>** 1346.89 (M - 3RSO<sub>3</sub><sup>-</sup>, C<sub>143</sub>H<sub>299</sub>Br<sub>6</sub>N<sub>19</sub>O<sub>37</sub>Pt<sub>3</sub>S<sub>3</sub> requires 1346.85).

Lipophilic mononuclear Pt complexes (**[Pt(II)(en)<sub>2</sub>](RSO<sub>3</sub>)<sub>2</sub>** and **[Pt(IV)Br<sub>2</sub>(en)<sub>2</sub>](RSO<sub>3</sub>)<sub>2</sub>**) were prepared according to Scheme S4.

**Scheme S4** Preparation of lipophilic mononuclear Pt complexes.

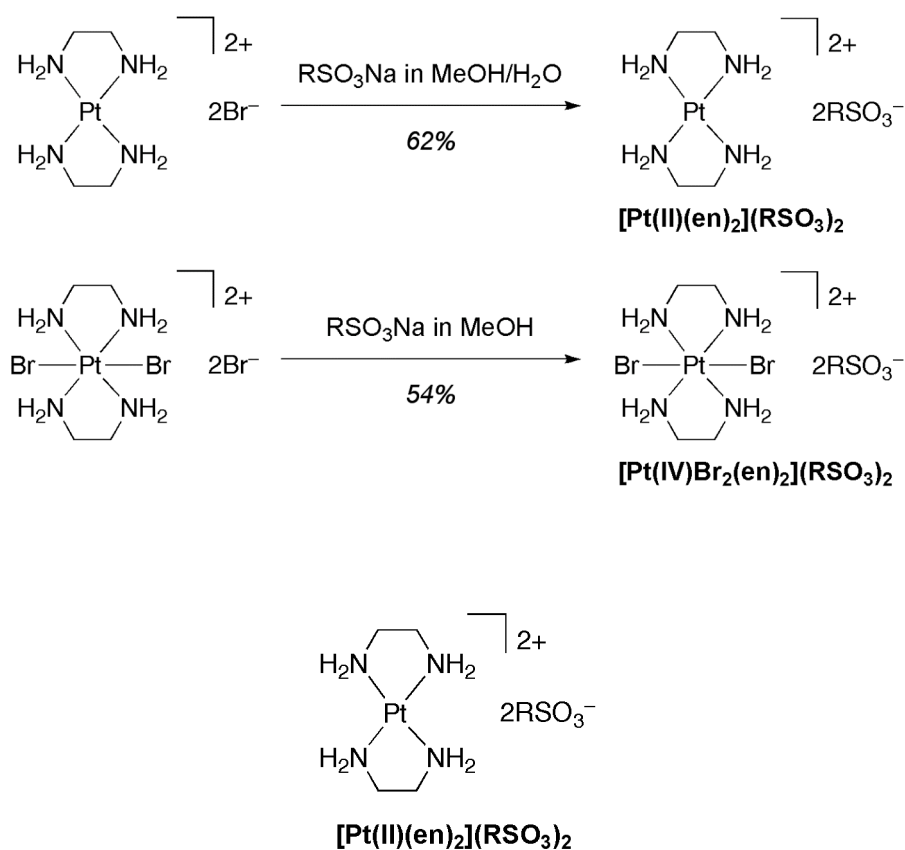

#### Synthesis of **[Pt(II)(en)<sub>2</sub>](RSO<sub>3</sub>)<sub>2</sub>**

To a solution of **[Pt(II)(en)<sub>2</sub>Br<sub>2</sub>]** (30.0 mg, 63.1 μmol) in water (0.5 cm<sup>3</sup>) was added RSO<sub>3</sub>Na (65.1 mg, 114 μmol) at room temperature. After shaking for 4 h at 55 °C with an ultrasonic cleaning machine, the suspension was centrifuged and the precipitate was lyophilized. The residue was dissolved in methanol/water (1:1, 0.4 cm<sup>3</sup>) and again shaken for 4 h at 55 °C with an ultrasonic cleaning machine.

The suspension was centrifuged and the precipitate was washed with methanol/water (1:1,  $3 \times 0.2 \text{ cm}^3$ ) and lyophilized to obtain  $[\text{Pt(II)(en)}_2](\text{RSO}_3)_2$  (50.1 mg, 62%) as a white solid (Found: C, 54.13; H, 9.96; N, 3.89.  $\text{C}_{64}\text{H}_{138}\text{N}_4\text{O}_{12}\text{PtS}_2$  requires C, 54.32; H, 9.83; N, 3.96);  $\delta_{\text{H}}$ (500 MHz;  $\text{CDCl}_3$ ;  $\text{Me}_4\text{Si}$ ) 5.57 (br, 8H,  $2 \times \text{NH}_2\text{CH}_2\text{CH}_2\text{NH}_2$ ), 3.74 (t,  $J = 6.4 \text{ Hz}$ , 4H,  $2 \times -\text{CH}_2\text{SO}_3$ ), 3.65-3.61 (m, 2H,  $2 \times$  methine), 3.52-3.46 (m, 8H,  $4 \times -\text{OCH}_2\text{CHO-}$ ), 3.45-3.39 (m, 8H,  $4 \times -\text{CH}_2\text{OCH}_2\text{CHO-}$ ), 3.01-2.98 (m, 4H,  $2 \times -\text{CH}_2\text{CH}_2\text{CH}_2\text{SO}_3$ ), 2.67 (s, 8H,  $2 \times \text{NH}_2\text{CH}_2\text{CH}_2\text{NH}_2$ ), 2.17-2.11 (m, 4H,  $2 \times -\text{CH}_2\text{CH}_2\text{SO}_3$ ), 1.56-1.52 (m, 8H,  $4 \times -\text{CH}_2\text{CH}_2\text{OCH}_2\text{CHO-}$ ), 1.31-1.26 (m, 72H,  $4 \times \text{CH}_3(\text{CH}_2)_9-$ ), 0.88 (t,  $J = 6.9 \text{ Hz}$ , 12H,  $4 \times \text{CH}_3(\text{CH}_2)_9-$ );  $m/z$  (ESI-TOF) 864.61 ( $\text{M} - 2\text{RSO}_3^-$ .  $\text{C}_{34}\text{H}_{77}\text{N}_4\text{O}_6\text{PtS}$  requires 864.52).

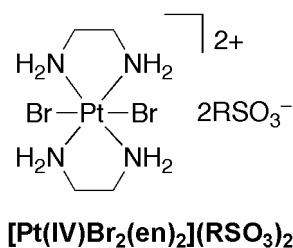

#### Synthesis of $[\text{Pt(IV)Br}_2(\text{en})_2](\text{RSO}_3)_2$

To a solution of  $[\text{Pt(IV)Br}_2(\text{en})_2]\text{Br}_2$  (50.0 mg, 78.8  $\mu\text{mol}$ ) in methanol ( $1.0 \text{ cm}^3$ ) was added  $\text{RSO}_3\text{Na}$  (81.2 mg, 142  $\mu\text{mol}$ ) at room temperature. After stirring for 40 h at room temperature, the solvent was removed under reduced pressure and dried *in vacuo*. The residue was washed with water ( $0.7 \text{ cm}^3$ ) and acetone/water (1:3,  $2 \times 0.4 \text{ cm}^3$ ), and then lyophilized. The crude material (92.3 mg) was recrystallized by methanol/2-propanol (1:10,  $5.5 \text{ cm}^3$ ) to give  $[\text{Pt(IV)Br}_2(\text{en})_2](\text{RSO}_3)_2$  (60.6 mg, 54%) as a yellow solid (Found: C, 48.65; H, 8.75; N, 3.45.  $\text{C}_{64}\text{H}_{138}\text{Br}_2\text{N}_4\text{O}_{12}\text{PtS}_2$  requires C, 48.81; H, 8.83; N, 3.56);  $\delta_{\text{H}}$ (500 MHz;  $\text{CD}_3\text{OD}$ ;  $\text{Me}_4\text{Si}$ ) 3.70 (t,  $J = 6.2 \text{ Hz}$ , 4H,  $2 \times -\text{CH}_2\text{SO}_3$ ), 3.60-3.56 (m, 2H,  $2 \times$  methine), 3.53-3.50 (m, 8H,  $4 \times -\text{OCH}_2\text{CHO-}$ ), 3.48-3.42 (m, 8H,  $4 \times -\text{CH}_2\text{OCH}_2\text{CHO-}$ ), 3.04-2.99 (m, 8H,  $2 \times \text{NH}_2\text{CH}_2\text{CH}_2\text{NH}_2$ ), 2.91-2.88 (m, 4H,  $2 \times -\text{CH}_2\text{CH}_2\text{CH}_2\text{SO}_3$ ), 2.05-1.99 (m, 4H,  $2 \times -\text{CH}_2\text{CH}_2\text{SO}_3$ ), 1.58-1.53 (m, 8H,  $4 \times -\text{CH}_2\text{CH}_2\text{OCH}_2\text{CHO-}$ ), 1.35-1.29 (m, 72H,  $4 \times \text{CH}_3(\text{CH}_2)_9-$ ), 0.90 (t,  $J = 7.0 \text{ Hz}$ , 12H,  $4 \times \text{CH}_3(\text{CH}_2)_9-$ );  $m/z$  (ESI-TOF) 1025.47 ( $\text{M} - 2\text{RSO}_3^-$ .  $\text{C}_{34}\text{H}_{77}\text{N}_4\text{NaO}_6\text{PtS}$  requires 1025.36).

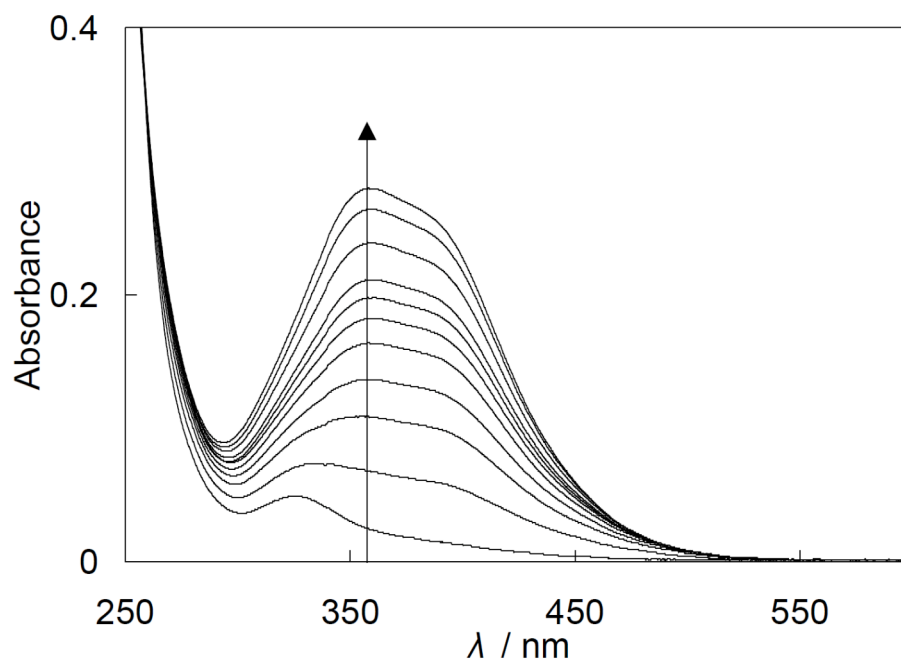

**Fig. S1** Photometric titration spectra of  $[\mathbf{1b}(\text{Pt}(\text{IV})\text{Br}_2(\text{en}))_3](\text{RSO}_3)_6$  with  $[\mathbf{1a}(\text{Pt}(\text{II})(\text{en}))_2](\text{RSO}_3)_4$  in  $\text{CH}_2\text{Cl}_2$  at 293 K ( $l = 1$ ).  $[[\mathbf{1b}(\text{Pt}(\text{IV})\text{Br}_2(\text{en}))_3](\text{RSO}_3)_6] = 12.5 \mu\text{M}$ .  $[[\mathbf{1a}(\text{Pt}(\text{II})(\text{en}))_2](\text{RSO}_3)_4] = 0.0, 2.5, 5.0, 7.5, 10, 12.5, 15, 17.5, 20, 25, 37.5$  and  $50 \mu\text{M}$ .

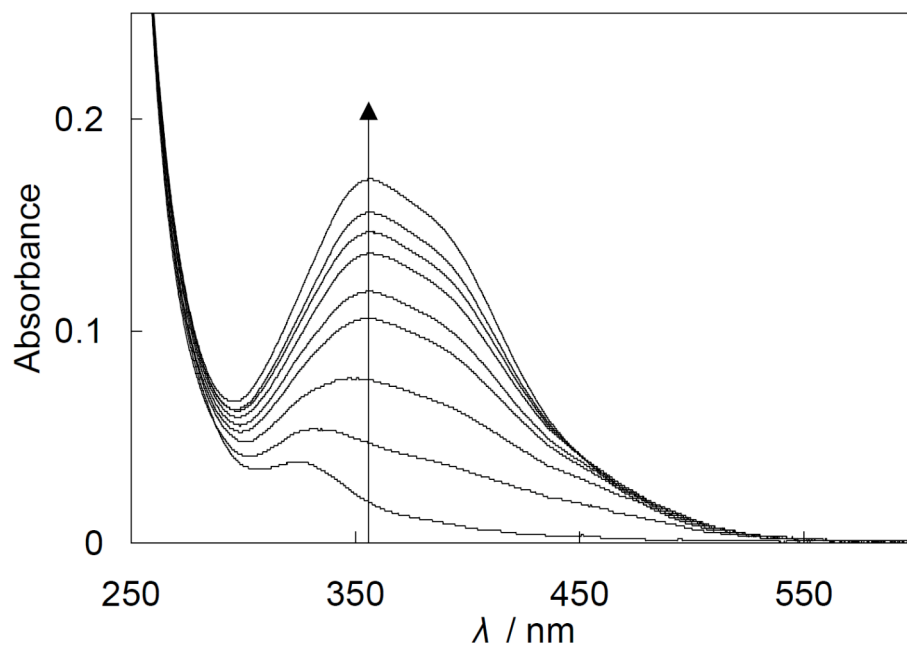

**Fig. S2** Photometric titration spectra of  $[\mathbf{1d}(\text{Pt(IV)Br}_2(\text{en}))_{10}](\text{RSO}_3)_{20}$  with  $[\mathbf{1c}(\text{Pt(II)}(\text{en}))_9](\text{RSO}_3)_{18}$  in  $\text{CH}_2\text{Cl}_2$  at 293 K ( $l = 1$ ).  $[[\mathbf{1d}(\text{Pt(IV)Br}_2(\text{en}))_{10}](\text{RSO}_3)_{20}] = 2.5 \mu\text{M}$ .  $[[\mathbf{1c}(\text{Pt(II)}(\text{en}))_9](\text{RSO}_3)_{18}] = 0.0, 0.5, 1.0, 1.5, 2.0, 2.5, 3.0, 3.5$  and  $5.0 \mu\text{M}$ .

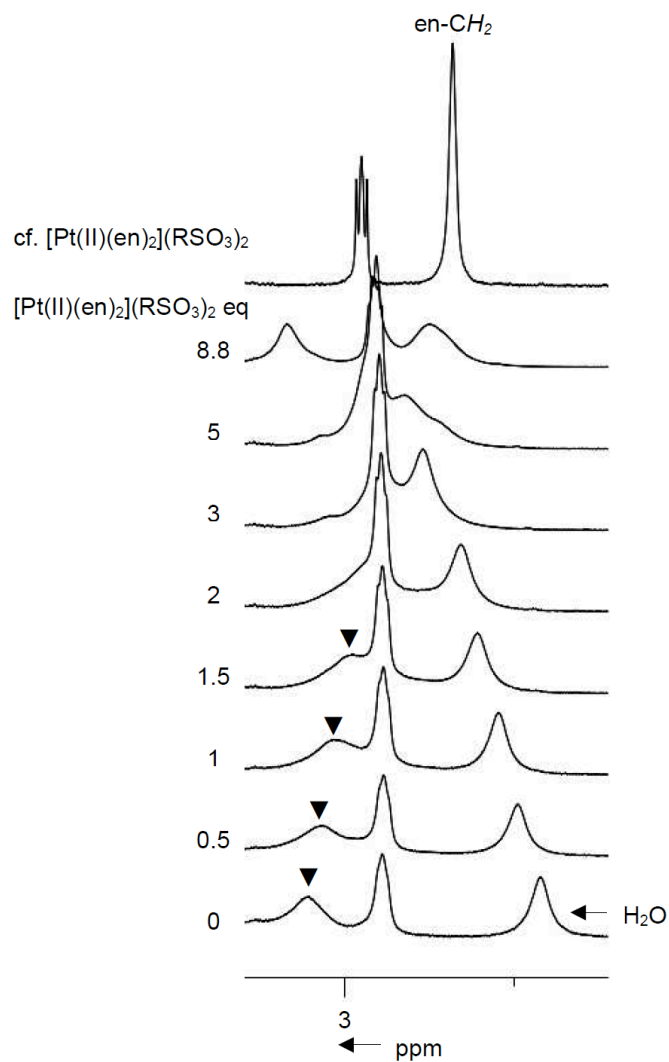

**Fig. S3**  $^1\text{H}$  NMR titration spectra of  $[\mathbf{1a}(\text{Pt}(\text{IV})\text{Br}_2(\text{en}))_2](\text{RSO}_3)_4$  (5 mM) with  $[\text{Pt}(\text{II})(\text{en})_2](\text{RSO}_3)_2$  in  $\text{CD}_2\text{Cl}_2$  at 293 K. ▼ is the peak of methylene groups of ethylenediamine in  $[\mathbf{1a}(\text{Pt}(\text{IV})\text{Br}_2(\text{en}))_2](\text{RSO}_3)_4$ .

### References

1. L. Zhang, G. S. Kauffman, J. A. Pesti, J. Yin, *J. Org. Chem.*, 1997, **62**, 6918-6920.
2. A. W. Schwabacher, J. W. Lane, M. W. Schiesher, K. M. Leigh, C. W. Johnson, *J. Org. Chem.*, 1998, **63**, 1727-1729.
3. F. Basolo, J. C. Bailar, Jr., B. R. Tarr, *J. Am. Chem. Soc.*, 1950, **72**, 2433-2438.
4. G. W. Watt, R. E. McCarley, *J. Am. Chem. Soc.*, 1957, **79**, 3315-3317.
